# Supplementary material for: Brain controllability mediates the effects of early life adversity on adolescent behavior and cognition moderated by genetic risks
Source: Research Square preprint supplement (doi:10.21203/rs.3.rs-8777490/v1), 2026-03-19
Supplement: Supplementary file 1 [file c1f8dee80c8a4ec82839c388.docx]

**Supplementary Materials**

**Brain controllability mediates the effects of early life adversity on adolescent behavior and cognition moderated by genetic risks**

Huaigui Liu1,2#, Yurong Jiang1#, Huili Sun3#, Matthew Rosenblatt3, Jean Ye4, Chunshui Yu1*, Dustin Scheinost 2,3,4,5,6,7,8*

1 Department of Radiology, Tianjin Key Lab of Functional Imaging & State Key Laboratory of Experimental Hematology, Tianjin Medical University General Hospital, Tianjin, China

2 Department of Radiology & Biomedical Imaging, Yale School of Medicine, New Haven, CT, USA

3 Department of Biomedical Engineering, Yale University, New Haven, CT, USA

4 Interdepartmental Neuroscience Program, Yale School of Medicine, New Haven, CT, USA

5 Department of Psychiatry, Yale School of Medicine, New Haven, CT, USA

6 Wu Tsai Institute, Yale University, New Haven, CT, USA

7 Department of Statistics & Data Science, Yale University, New Haven, CT, USA

8 Child Study Center, Yale School of Medicine, New Haven, CT, USA

# These authors contributed equally to the article.

*To whom correspondence should be addressed: Huaigui Liu, Email: huaigui.liu@yale.edu; Chunshui Yu, Email: chunshuiyu@tmu.edu.cn; Dustin Scheinost, Email: [dustin.scheinost@yale.edu](mailto:dustin.scheinost@yale.edu).

Outlines

[Supplementary Tables 4](#_Toc219725794)

[Supplementary Table 1. Definition of All Variables. 4](#_Toc219725795)

[Supplementary Table 2. European Discovery Cohort Counts. 17](#_Toc219725796)

[Supplementary Table 3. Model Fit Statistics for 5-Factor CFA Model in the Full Sample and 10-Fold Cross-validation Analyses. 17](#_Toc219725797)

[Supplementary Table 4. Standardized Factor Loadings of ELAs for the 5-Factor Solution. 17](#_Toc219725798)

[Supplementary Table 5. The Associations of ELA Factors and Brain Network Controllability. 18](#_Toc219725799)

[Supplementary Table 6. The Associations of ELA Factors and Behavioral Outcomes. 20](#_Toc219725800)

[Supplementary Table 7. The Associations of Brain Network Controllability and Behavioral Measures. 20](#_Toc219725801)

[Supplementary Table 8. The Associations of Brain Network Controllability and Cognitive measures. 21](#_Toc219725802)

[Supplementary Table 9. Interaction Effects Between ELA Factors and Ancestry on Brain Network Controllability. 22](#_Toc219725803)

[Supplementary Table 10. Mediation Results among ELA Factors, Brain Controllability and Behavioral measures. 23](#_Toc219725804)

[Supplementary Table 11. Significant Moderated Results among ELA Factors, Brain controllability and Behavioral Measures in European Ancestry. 26](#_Toc219725805)

[Supplementary Table 12. Autoregressive and Cross-domain Paths from Cross-lagged Panel Models Examining Brain Controllability and Cognition. 29](#_Toc219725806)

[Supplementary Table 13. Autoregressive and Cross-domain Paths from Cross-lagged Panel Models Examining Brain Controllability and Behavior. 30](#_Toc219725807)

[Supplementary Figures 33](#_Toc219725808)

[Supplementary Figure 1. Data Processing Workflow for ELAs, Behavioral Outcomes and DTI-derived Controllability. 33](#_Toc219725809)

[Supplementary Figure 2. Early Life Adversities Variables Included in the Analysis. 34](#_Toc219725810)

[Supplementary Figure 3. Model Fit Indices across Exploratory Factor Analysis Models with 1-9 Factors. 34](#_Toc219725811)

[Supplementary Figure 4. Pearson Correlations between Brain Controllability Metrics. 35](#_Toc219725812)

[Supplementary Figure 5. Pearson Correlations between Behavioral outcomes. 35](#_Toc219725813)

[Supplementary Figure 6. Correlation of Effect Sizes Across Sex Groups for ELA Factors, Brain Network Controllability and Behavior Associations. 36](#_Toc219725814)

[Supplementary Figure 7. Sex-stratified Associations between ELA Factors and Brain Network Controllability. 36](#_Toc219725815)

[Supplementary Figure 8. Sex-stratified Associations between ELA Factors and Behavioral Outcomes. 38](#_Toc219725816)

[Supplementary Figure 9. Sex-stratified Associations between Brain Network Controllability and Behavioral Outcomes. 39](#_Toc219725817)

[Supplementary Figure 10. Correlation of Effect Sizes Across Ancestry Groups for ELA Factors, Brain Network Controllability and Behavior Associations. 40](#_Toc219725818)

[Supplementary Figure 11. Ancestry-stratified Associations between ELA Factors and Brain Network Controllability. 40](#_Toc219725819)

[Supplementary Figure 12. Ancestry-stratified Associations between ELA Factors and Behavioral Outcomes. 41](#_Toc219725820)

[Supplementary Figure 13. Ancestry-stratified Associations between Brain Network Controllability and Behavioral Outcomes. 42](#_Toc219725821)

[Supplementary Figure 14. Interaction Effects Between ELA Factors and Ancestry on Brain Network Controllability. 43](#_Toc219725822)

# Supplementary Tables

## Supplementary Table 1. Definition of All Variables.

| **Variable** | **Variable name** | **Note** | **Detail** | **Sample size** | **Percentage of missing data** |
| --- | --- | --- | --- | --- | --- |
| **Age** | demo_brthdat_v2 | How old is the child? | years old | 11 868 | 0.09% |
| **Sex** | demo_sex_v2 | What sex was the child assigned at birth, on the original birth certificate? | 1 = Male; 2 = Female; 3 = Intersex-Male; 4 = Intersex-Female; 999 = Don't know; 777 = Refuse to answer Prefiero no responder | 11 868 | 0% |
| **Race** | race_ethnicity | Race Ethnicity (Child) | 1 = White; 2 = Black; 3 = Hispanic; 4 = Asian; 5 = Other | 11 868 | 0.01% |
| **Handedness** | ehi_y_ss_scoreb | Handedness score rating | 1 = right handed; 2 = left handed; 3 = mixed handed | 11 868 | 0% |
| **Scanner site** | site_id_l | Site ID at each event |  | 11 868 | 0% |
| **Puberty** | pds_1_p | Would you say that your child's growth in height | 1 = has not yet begun to grow; 2 = has barely started to grow; 3 = is definitely underway Definitivamente; 4 = seems complete ; 999 = I don't know | 11 868 | 4% |
| pds_2_p | And how about the growth of your child's body hair ("body hair" means hair any place other than their head, such as under their arms)? Would you say that your child's body hair growth | 1 = has not yet begun to grow; 2 = has barely started to grow; 3 = is definitely underway Definitivamente; 4 = seems complete ; 999 = I don't know | 11 868 | 2.6% |
| pds_3_p | Have you noticed any changes to their skin, especially pimples? | 1 = skin has not yet started changing; 2 = skin has barely started changing; 3 = skin changes are definitely underway Definitivamente; 4 = skin changes seem complete; 999 = I don't know | 11 868 | 1.8% |
| pds_m5_p | Has he begun to grow hair on his face? | 1 = facial hair has not yet started growing; 2 = facial hair has barely started growing; 3 = facial hair has definitely started Definitivamente; 4 = facial growth seems complete; 999 = I don't know | 11 868 | 48.7% |
| pds_m4_p | Have you noticed a deepening of his voice? | 1 = voice has not yet started changing; 2 = voice has barely started changing; 3 = voice changes are definitely underway Definitivamente; 4 = voice changes seem complete; 999 = I don't know | 11 868 | 48.6% |
| pds_f4_p | Have you noticed that your child's breasts have begun to grow? | 1 = have not yet started growing; 2 = have barely started growing; 3 = breast growth is definitely underway Definitivamente; 4 = breast growth seems complete; 999 = I don't know | 11 868 | 52.8% |
| pds_f5b_p | Has your child begun to menstruate? | 4 = Yes Sí; 1 = No No; 999 = I don't know No sé | 11 868 | 52.8% |
| **Early life adversity variables** | famhx_ss_fath_prob_alc_p | father alcohol problem | 0=no problem endorsed; 1=problem endorsed | 11 868 | 4.0% |
| famhx_ss_fath_prob_dg_p | father drug use problem | 0=no problem endorsed; 1=problem endorsed | 11 868 | 3.2% |
| famhx_ss_moth_prob_alc_p | mother alcohol problem | 0=no problem endorsed; 1=problem endorsed | 11 868 | 4.1% |
| famhx_ss_moth_prob_dg_p | mother drug use problem | 0=no problem endorsed; 1=problem endorsed | 11 868 | 3.0% |
| famhx_4d_p_1 | biological mother (Marital Matrimonial) | 0 = No; 1 = Yes | 11 868 | 0.9% |
| famhx_4d_p_2 | biological mother (Work Laboral) | 0 = No; 1 = Yes | 11 868 | 0.9% |
| famhx_4d_p_3 | biological mother (Arrests/DUI Arrestos/DUI) | 0 = No; 1 = Yes | 11 868 | 0.9% |
| famhx_4d_p_6 | biological mother (Isolated self, arguments, drunk a lot, familia, Discusiones, drogado/a con frecuencia) | 0 = No; 1 = Yes | 11 868 | 0.9% |
| famhx4a_p_1 | biological father (Marital Matrimonial) | 0 = No; 1 = Yes | 11 868 | 0.7% |
| famhx4a_p_2 | biological father (Work Laboral) | 0 = No; 1 = Yes | 11 868 | 0.7% |
| famhx4a_p_3 | biological father (Arrests/DUI Arrestos/DUI) | 0 = No; 1 = Yes | 11 868 | 0.7% |
| famhx4a_p_6 | biological father (Isolated self, arguments, drunk a lot, familia, Discusiones, drogado/a con frecuencia) | 0 = No; 1 = Yes | 11 868 | 0.7% |
| fam_history_q5d_drugs_1 | biological mother (Marital Matrimonial) | 0 = No; 1 = Yes | 11 868 | 0.4% |
| fam_history_q5d_drugs_2 | biological mother (Work Laboral) | 0 = No; 1 = Yes | 11 868 | 0.4% |
| fam_history_q5d_drugs_3 | biological mother (Arrests/DUI Arrestos/DUI) | 0 = No; 1 = Yes | 11 868 | 0.4% |
| fam_history_q5d_drugs_6 | biological mother (Isolated self, arguments, drunk a lot, familia, Discusiones, drogado/a con frecuencia) | 0 = No; 1 = Yes | 11 868 | 0.4% |
| fam_history_q5a_drugs_1 | biological father (Marital Matrimonial) | 0 = No; 1 = Yes | 11 868 | 0.6% |
| fam_history_q5a_drugs_2 | biological father (Work Laboral) | 0 = No; 1 = Yes | 11 868 | 0.6% |
| fam_history_q5a_drugs_3 | biological father (Arrests/DUI Arrestos/DUI) | 0 = No; 1 = Yes | 11 868 | 0.6% |
| fam_history_q5a_drugs_6 | biological father (Isolated self, arguments, drunk a lot, familia, Discusiones, drogado/a con frecuencia) | 0 = No; 1 = Yes | 11 868 | 0.6% |
| asr_scr_depress_t | Depressive Problems ASR DSM-5-Oriented Scale (t-score) | T-scores in relation to norms for each gender at ages 18-35 and 36-59, based on national probability samples. | 11 868 | 0% |
| asr_scr_anxdisord_t | Anxiety Problems ASR DSM-5-Oriented Scale (t-score) | T-scores in relation to norms for each gender at ages 18-35 and 36-59, based on national probability samples. | 11 868 | 0% |
| asr_scr_somaticpr_t | Somatic Problems ASR DSM-5-Oriented Scale (t-score) | T-scores in relation to norms for each gender at ages 18-35 and 36-59, based on national probability samples. | 11 868 | 0% |
| asr_scr_avoidant_t | Avoidant Personality Problems ASR DSM-5-Oriented Scale (t-score) | T-scores in relation to norms for each gender at ages 18-35 and 36-59, based on national probability samples. | 11 868 | 0% |
| asr_scr_adhd_t | AD/H Problems ASR DSM-5-Oriented Scale (t-score) | T-scores in relation to norms for each gender at ages 18-35 and 36-59, based on national probability samples. | 11 868 | 0% |
| asr_scr_antisocial_t | Antisocial Personality Problems ASR DSM-5-Oriented Scale (t-score) | T-scores in relation to norms for each gender at ages 18-35 and 36-59, based on national probability samples. | 11 868 | 0% |
| asr_scr_inattention_t | Inattention ASR DSM-5-Oriented Scale (t-score) | T-scores in relation to norms for each gender at ages 18-35 and 36-59, based on national probability samples. | 11 868 | 0% |
| asr_scr_hyperactive_t | Hyperactivity-Impulsivity ASR DSM-5-Oriented Scale (t-score) | T-scores in relation to norms for each gender at ages 18-35 and 36-59, based on national probability samples. | 11 868 | 0% |
| fam_history_q6a_depression | biological father | 0 = No; 1 = Yes; 999 = Don't know | 11 868 | 51.0% |
| fam_history_q6d_depression | biological mother | 0 = No; 1 = Yes; 999 = Don't know | 11 868 | 48.7% |
| fam_history_q7a_mania | biological father | 0 = No; 1 = Yes; 999 = Don't know | 11 868 | 87.5% |
| fam_history_q7d_mania | biological mother | 0 = No; 1 = Yes; 999 = Don't know | 11 868 | 46.8% |
| fam_history_q8a_visions | biological father | 0 = No; 1 = Yes; 999 = Don't know | 11 868 | 46.5% |
| fam_history_q8d_visions | biological mother | 0 = No; 1 = Yes; 999 = Don't know | 11 868 | 46.5% |
| fam_history_q9a_trouble | biological father | 0 = No; 1 = Yes; 999 = Don't know | 11 868 | 39.7% |
| fam_history_q9d_trouble | biological mother | 0 = No; 1 = Yes; 999 = Don't know | 11 868 | 39.6% |
| fam_history_q10a_nerves | biological father | 0 = No; 1 = Yes; 999 = Don't know | 11 868 | 44.0% |
| fam_history_q10d_nerves | biological mother | 0 = No; 1 = Yes; 999 = Don't know | 11 868 | 43.8% |
| fam_history_q13a_suicide | biological father | 0 = No; 1 = Yes; 999 = Don't know | 11 868 | 45.8% |
| fam_history_q13d_suicide | biological mother | 0 = No; 1 = Yes; 999 = Don't know | 11 868 | 45.7% |
| demo_prnt_marital_v2 | Are you now married, widowed, divorced, separated, never married or living with a partner? | 1 = Married; 2 = Widowed; 3 = Divorced; 4 = Separated; 5 = Never married; 6 = Living with partner ; 777 = Refused to answer | 11 868 | 0.8% |
| demo_prim | You are the: Usted es: | 1 = Child's Biological Mother; 2 = Child's Biological Father; 3 = Adoptive Parent Padre o madre adoptivo(a); 4 = Child's Custodial Parent; 5 = Other | 11 868 | 0% |
| crpbi_parent1_y | First caregiver. Makes me feel better after talking over my worries with him/her | 1 = Not like him/her; 2 = Somewhat like him/her; 3 = A lot like him/her | 11 868 | 0.3% |
| crpbi_parent2_y | First caregiver. Smiles at me very often. | 1 = Not like him/her; 2 = Somewhat like him/her; 3 = A lot like him/her | 11 868 | 0.3% |
| crpbi_parent3_y | First caregiver. Is able to make me feel better when I am upset. | 1 = Not like him/her; 2 = Somewhat like him/her; 3 = A lot like him/her | 11 868 | 0.3% |
| crpbi_parent4_y | First caregiver. Believes in showing his/her love for me. | 1 = Not like him/her; 2 = Somewhat like him/her; 3 = A lot like him/her | 11 868 | 0.3% |
| crpbi_parent5_y | First caregiver. Is easy to talk to. | 1 = Not like him/her; 2 = Somewhat like him/her; 3 = A lot like him/her | 11 868 | 0.3% |
| crpbi_caregiver12_y | Makes me feel better after talking over my worries with them. | 1 = Not like them ; 2 = Somewhat like them ; 3 = A lot like them | 11 868 | 7.7% |
| crpbi_caregiver13_y | Second caregiver. Smiles at me very often. | 1 = Not like them ; 2 = Somewhat like them ; 3 = A lot like them | 11 868 | 7.7% |
| crpbi_caregiver14_y | Second caregiver. Is able to make me feel better when I am upset. | 1 = Not like them ; 2 = Somewhat like them ; 3 = A lot like them | 11 868 | 7.7% |
| crpbi_caregiver15_y | Believes in showing their love for me. | 1 = Not like them ; 2 = Somewhat like them ; 3 = A lot like them | 11 868 | 7.7% |
| crpbi_caregiver16_y | Second caregiver. Is easy to talk to. | 1 = Not like them ; 2 = Somewhat like them ; 3 = A lot like them | 11 868 | 7.7% |
| fam_enviro1_p | We fight a lot in our family | 1 = True; 0 = False | 11 868 | 0% |
| fam_enviro2r_p | Family members rarely become openly angry | 0 = True; 1 = False | 11 868 | 0% |
| fam_enviro3_p | Family members sometimes get so angry they throw things | 1 = True; 0 = False | 11 868 | 0% |
| fam_enviro4r_p | Family members hardly ever lose their tempers. | 0 = True; 1 = False | 11 868 | 0% |
| fam_enviro5_p | Family members often criticize each other | 1 = True; 0 = False | 11 868 | 0% |
| fam_enviro6_p | Family members sometimes hit each other | 1 = True; 0 = False | 11 868 | 0% |
| fam_enviro7r_p | If there is a disagreement in our family, we try hard to smooth things over and keep the peace | 0 = True; 1 = False | 11 868 | 0% |
| fam_enviro8_p | Family members often try to one-up or outdo each other | 1 = True; 0 = False | 11 868 | 0% |
| fam_enviro9r_p | In our family, we believe you don't ever get anywhere by raising your voice. | 0 = True; 1 = False | 11 868 | 0.1% |
| fes_1_p | Family members really help and support one another | 1 = True; 0 = False | 11 868 | 100% |
| fes_2r_p | Family members often keep their feelings to themselves | 0 = True; 1 = False | 11 868 | 100% |
| fes_9_p | Activities in our family are pretty carefully planned | 1 = True; 0 = False | 11 868 | 100% |
| fes_19_p | We are generally very neat and orderly. | 1 = True; 0 = False | 11 868 | 100% |
| fes_29r_p | It's often hard to find things when we need them in our household | 0 = True; 1 = False | 11 868 | 100% |
| fes_31_p | There is a feeling of togetherness in our family | 1 = True; 0 = False | 11 868 | 100% |
| fes_32_p | We tell each other about our personal problems. | 1 = True; 0 = False | 11 868 | 100% |
| fes_39_p | Being on time is very important in our family | 1 = True; 0 = False | 11 868 | 100% |
| fes_42_p | If we feel like doing something on the spur of the moment, we often just pick up and go | 1 = True; 0 = False | 11 868 | 100% |
| fes_49r_p | People change their minds often in our family | 0 = True; 1 = False | 11 868 | 100% |
| fes_51_p | Family members really back each other up | 1 = True; 0 = False | 11 868 | 100% |
| fes_52r_p | Someone usually gets upset if you complain in our family. | 0 = True; 1 = False | 11 868 | 100% |
| fes_59_p | Family members make sure their rooms are neat | 1 = True; 0 = False | 11 868 | 100% |
| fes_69_p | Each person's duties are clearly defined in our family. | 1 = True; 0 = False | 11 868 | 100% |
| fes_72r_p | We are usually careful about what we say to each other. | 0 = True; 1 = False | 11 868 | 100% |
| fes_79r_p | Money is not handled very carefully in our family. | 0 = True; 1 = False | 11 868 | 100% |
| fes_81_p | There is plenty of time and attention for everyone in our family. | 1 = True; 0 = False | 11 868 | 100% |
| fes_youth_q1 | We fight a lot in our family. | 1 = True; 0 = False | 11 868 | 0.2% |
| fes_youth_q2 | Family members rarely become openly angry. | 0 = True; 1 = False | 11 868 | 0.2% |
| fes_youth_q3 | Family members sometimes get so angry they throw things |  | 11 868 | 0.2% |
| fes_youth_q4 | Family members hardly ever lose their tempers. | 0 = True; 1 = False | 11 868 | 0.2% |
| fes_youth_q5 | Family members often criticize each other. | 1 = True; 0 = False | 11 868 | 0.2% |
| fes_youth_q6 | Family members sometimes hit each other. | 1 = True; 0 = False | 11 868 | 0.2% |
| fes_youth_q7 | If there's a disagreement in our family, we try hard to smooth things over and keep the peace. | 0 = True; 1 = False | 11 868 | 0.2% |
| fes_youth_q8 | Family members often try to one-up or outdo each other. | 1 = True; 0 = False | 11 868 | 0.2% |
| fes_youth_q9 | In our family, we believe you don't ever get anywhere by raising your voice. | 0 = True; 1 = False | 11 868 | 0.2% |
| ksads_ptsd_raw_754_p | A car accident in which your child or another person in the car was hurt bad enough to require medical attention | 0 = No; 1 = Yes | 11 568 | 0.1% |
| ksads_ptsd_raw_755_p | Another significant accident for which your child needed specialized and intensive medical treatment | 0 = No; 1 = Yes | 11 568 | 0.1% |
| ksads_ptsd_raw_756_p | Witnessed or caught in a fire that caused significant property damage or personal injury | 0 = No; 1 = Yes | 11 568 | 0.1% |
| ksads_ptsd_raw_757_p | Witnessed or caught in a natural disaster that caused significant property damage or personal injury | 0 = No; 1 = Yes | 11 568 | 0.1% |
| ksads_ptsd_raw_758_p | Witnessed or present during an act of terrorism (e.g., Boston marathon bombing) | 0 = No; 1 = Yes | 11 568 | 0.1% |
| ksads_ptsd_raw_759_p | Witnessed death or mass destruction in a war zone | 0 = No; 1 = Yes | 11 568 | 0.1% |
| ksads_ptsd_raw_760_p | Witnessed someone shot or stabbed in the community | 0 = No; 1 = Yes | 11 568 | 0.1% |
| ksads_ptsd_raw_761_p | Shot, stabbed, or beaten brutally by a non-family member | 0 = No; 1 = Yes | 11 568 | 0.1% |
| ksads_ptsd_raw_762_p | Shot, stabbed, or beaten brutally by a grown up in the home | 0 = No; 1 = Yes | 11 568 | 0.1% |
| ksads_ptsd_raw_763_p | Beaten to the point of having bruises by a grown up in the home | 0 = No; 1 = Yes | 11 568 | 0.1% |
| ksads_ptsd_raw_764_p | A non-family member threatened to kill your child | 0 = No; 1 = Yes | 11 568 | 0.1% |
| ksads_ptsd_raw_765_p | A family member threatened to kill your child | 0 = No; 1 = Yes | 11 568 | 0.1% |
| ksads_ptsd_raw_766_p | Witness the grownups in the home push, shove or hit one another | 0 = No; 1 = Yes | 11 568 | 0.07% |
| ksads_ptsd_raw_767_p | A grown up in the home touched your child in their privates, had your child touch their privates, or did other sexual things to your child | 0 = No; 1 = Yes | 11 568 | 0.1% |
| ksads_ptsd_raw_768_p | An adult outside your family touched your child in their privates, had your child touch their privates or did other sexual things to your child | 0 = No; 1 = Yes | 11 568 | 0.1% |
| ksads_ptsd_raw_769_p | A peer forced your child to do something sexually | 0 = No; 1 = Yes | 11 568 | 0.1% |
| ksads_ptsd_raw_770_p | Learned about the sudden unexpected death of a loved one | 0 = No; 1 = Yes | 11 568 | 0.04% |
| reshist_addr1_adi_wsum | Residential history derived - Area Deprivation Index |  | 11 568 | 7.5% |
| demo_prnt_ed_v2 | What is the highest grade or level of school you have completed or the highest degree you have received? | 0 = Never attended/Kindergarten only; 1 = 1st grade; 2 = 2nd grade; 3 = 3rd grade; 4 = 4th grade; 5 = 5th grade; 6 = 6th grade; 7 = 7th grade; 8 = 8th grade; 9 = 9th grade; 10 = 10th grade; 11 = 11th grade; 12 = 12th grade; 13 = High school graduate Preparatoria terminada ; 14 = GED or equivalent Diploma General de Equivalencia (GED) o equivalente ; 15 = Some college; 16 = Associate degree: Occupational; 17 = Associate degree: Academic Program ; 18 = Bachelor's degree (ex. BA; 19 = Master's degree (ex. MA; 20 = Professional School degree (ex. MD; 21 = Doctoral degree (ex. PhD; 777 = Refused to answer Prefiero no responder | 11 868 | 0.1% |
| demo_prtnr_ed_v2 | What is the highest grade or level of school your partner completed or highest degree they received? | 0 = Never attended/Kindergarten only; 1 = 1st grade; 2 = 2nd grade; 3 = 3rd grade; 4 = 4th grade; 5 = 5th grade; 6 = 6th grade; 7 = 7th grade; 8 = 8th grade; 9 = 9th grade; 10 = 10th grade; 11 = 11th grade; 12 = 12th grade; 13 = High school graduate Preparatoria terminada ; 14 = GED or equivalent Diploma General de Equivalencia (GED) o equivalente ; 15 = Some college; 16 = Associate degree: Occupational; 17 = Associate degree: Academic Program ; 18 = Bachelor's degree (ex. BA; 19 = Master's degree (ex. MA; 20 = Professional School degree (ex. MD; 21 = Doctoral degree (ex. PhD; 777 = Refused to answer Prefiero no responder | 11 868 | 20.8% |
| demo_comb_income_v2 | What is your TOTAL COMBINED FAMILY INCOME for the past 12 months? | 1= Less than $5,000; 2=$5,000 through $11,999; 3=$12,000 through $15,999; 4=$16,000 through $24,999; 5=$25,000 through $34,999; 6=$35,000 through $49,999; 7=$50,000 through $74,999; 8= $75,000 through $99,999; 9=$100,000 through $199,999; 10=$200,000 and greater. 999 = Don't know No lo s√É¬© ; 777 = Refuse to answer No deseo responder | If Separated/Divorced, please average the two household incomes. Si es Separado(a) / Divorciado(a), por favor promedie los dos ingresos familiares | 11 868 | 0% |
| demo_fam_exp1_v2 | In the past 12 months, has there been a time when you and your immediate family experienced any of the following: Needed food but couldn't afford to buy it or couldn't afford to go out to get it? | 0 = No; 1 = Yes | 11 868 | 0.6% |
| demo_fam_exp2_v2 | In the past 12 months, has there been a time when you and your immediate family experienced any of the following: Were without telephone service because you could not afford it? | 0 = No; 1 = Yes | 11 868 | 0.4% |
| demo_fam_exp3_v2 | In the past 12 months, has there been a time when you and your immediate family experienced any of the following: Didn't pay the full amount of the rent or mortgage because you could not afford it? | 0 = No; 1 = Yes | 11 868 | 0.5% |
| demo_fam_exp4_v2 | In the past 12 months, has there been a time when you and your immediate family experienced any of the following: Were evicted from your home for not paying the rent or mortgage? | 0 = No; 1 = Yes | 11 868 | 0.3% |
| demo_fam_exp5_v2 | In the past 12 months, has there been a time when you and your immediate family experienced any of the following: Had services turned off by the gas or electric company, or the oil company wouldn't deliver oil because payments were not made? | 0 = No; 1 = Yes | 11 868 | 0.4% |
| demo_fam_exp6_v2 | In the past 12 months, has there been a time when you and your immediate family experienced any of the following: Had someone who needed to see a doctor or go to the hospital but didn't go because you could not afford it? | 0 = No; 1 = Yes | 11 868 | 0.3% |
| demo_fam_exp7_v2 | In the past 12 months, has there been a time when you and your immediate family experienced any of the following: Had someone who needed a dentist but couldn't go because you could not afford it? | 0 = No; 1 = Yes | 11 868 | 0.4% |
| parent_monitor_q1_y | How often do your parents/guardians know where you are? | 1 = Never; 2 = Almost Never; 3 = Sometimes; 4 = Often; 5 = Always or Almost Always | 11 868 | 0.2% |
| parent_monitor_q2_y | How often do your parents know who you are with when you are not at school and away from home? | 1 = Never; 2 = Almost Never; 3 = Sometimes; 4 = Often; 5 = Always or Almost Always | 11 868 | 0.2% |
| parent_monitor_q3_y | If you are at home when your parents or guardians are not, how often do you know how to get in touch with them? | 1 = Never; 2 = Almost Never; 3 = Sometimes; 4 = Often; 5 = Always or Almost Always | 11 868 | 0.2% |
| parent_monitor_q4_y | How often do you talk to your parent or guardian about your plans for the coming day, such as your plans about what will happen at school or what you are going to do with friends? | 1 = Never; 2 = Almost Never; 3 = Sometimes; 4 = Often; 5 = Always or Almost Always | 11 868 | 0.2% |
| parent_monitor_q5_y | In an average week, how many times do you and your parents/guardians, eat dinner together? | 1 = Never; 2 = Almost Never; 3 = Sometimes; 4 = Often; 5 = Always or Almost Always | 11 868 | 0.2% |
| kbi_p_c_live_full_time | Since we last saw you on, has your child lived with you full time? | 1=Yes;0=No | 11 863 | 0.0% |
| kbi_p_c_guard_5 | Who else does your child live with at least part of the time? | 0 = No; 1 = Yes | 11 863 | 94.2% |
| kbi_p_c_guard_6 | Who else does your child live with at least part of the time? | 0 = No; 1 = Yes | 11 863 | 94.2% |
| kbi_p_c_guard_7 | Who else does your child live with at least part of the time? | 0 = No; 1 = Yes | 11 863 | 94.2% |
| kbi_p_c_guard_8 | Who else does your child live with at least part of the time? | 0 = No; 1 = Yes | 11 863 | 94.2% |
| kbi_p_c_guard_9 | Who else does your child live with at least part of the time? | 0 = No; 1 = Yes | 11 863 | 94.2% |
| kbi_p_c_guard_10 | Who else does your child live with at least part of the time? | 0 = No; 1 = Yes | 11 863 | 94.2% |
| kbi_p_c_guard_11 | Who else does your child live with at least part of the time? | 0 = No; 1 = Yes | 11 863 | 94.2% |
| kbi_p_c_guard_12 | Who else does your child live with at least part of the time? | 0 = No; 1 = Yes | 11 863 | 94.2% |
| neighborhood1r_p | I feel safe walking in my neighborhood, day or night | 1 = Strongly Disagree; 2 = Disagree ; 3 = Neutral (neither agree nor disagree); 4 = Agree; 5 = Strongly Agree | 11 868 | 0.1% |
| neighborhood2r_p | Violence is not a problem in my neighborhood. | 1 = Strongly Disagree; 2 = Disagree ; 3 = Neutral (neither agree nor disagree); 4 = Agree; 5 = Strongly Agree | 11 868 | 0.2% |
| neighborhood3r_p | My neighborhood is safe from crime. | 1 = Strongly Disagree; 2 = Disagree ; 3 = Neutral (neither agree nor disagree); 4 = Agree; 5 = Strongly Agree | 11 868 | 0.3% |
| neighborhood_crime_y | My neighborhood is safe from crime. | 1 = Strongly Disagree; 2 = Disagree; 3 = Neutral (neither agree nor disagree); 4 = Agree; 5 = Strongly Agree | 11 868 | 0.2% |
| ksads_bully_raw_26 | Do you have any problems with bullying at school or in your neighborhood? | 1 = Yes; 0 = No | 11 844 | 1.6% |
| kbi_y_sex_orient_probs | Has this caused any problems for you with your family or with kids at school? | 1 = Not at all; 2 = Some; 3 = A lot; 777 = Refuse to answer | 11 849 | 98.7% |
| kbi_y_trans_prob | Has this caused any problems for you with your family or with kids at school? | 1 = Not at all; 2 = Some; 3 = A lot; 777 = Refuse to answer | 11 853 | 99.6% |
| kbi_p_c_bully | Does your child have any problems with bullying at school or in your neighborhood? | 1=Yes; 0=No | 11 863 | 0.0% |
| kbi_p_c_gay_problems | Has this caused any problems for you/your child with your family or with kids at school? | 1 = Not at all; 2 = Some ; 3 = A lot ; 4 = Decline to answer | 11 863 | 92.3% |
| kbi_p_c_trans_problems | Has this caused any problems for you/your child with your family or with kids at school? | 1 = Not at all; 2 = Some ; 3 = A lot ; 4 = Decline to answer | 11 868 | 98.9% |
| **Behavioral variables** | cbcl_scr_syn_internal_t | Internal CBCL Syndrome Scale (t-score) |  | 11 862 | 0% |
| cbcl_scr_syn_external_t | External CBCL Syndrome Scale (t-score) |  | 11 862 | 0% |
| cbcl_scr_syn_totprob_t | TotProb CBCL Syndrome Scale (t-score) |  | 11 862 | 0% |
| nihtbx_cryst_fc | Crystallized Composite Fully-Corrected T-score |  | 11 727 | 6.7% |
| nihtbx_fluidcomp_fc | Cognition Fluid Composite Fully-Corrected T-score |  | 11 727 | 7.1% |
| nihtbx_totalcomp_fc | Cognition Total Composite Score Fully-Corrected T-score |  | 11 727 | 7.2% |

## Supplementary Table 2. European Discovery Cohort Counts.

| **European GWAS** | **N cases** | **N controls** | **N total** |
| --- | --- | --- | --- |
| ADHD | 38 691 | 186 843 | 225 534 |
| ASD | 18 382 | 27 969 | 46 351 |

Abbreviations: ADHD, attention-deficit/hyperactivity disorder; ASD, autism spectrum disorder; GWAS, genome-wide association studies.

## Supplementary Table 3. Model Fit Statistics for 5-Factor CFA Model in the Full Sample and 10-Fold Cross-validation Analyses.

| **Samples** | **CFI** | **RMSEA** | **SRMR** |
| --- | --- | --- | --- |
| Full sample | 0.952 | 0.027 | 0.075 |
| Iteration 1 | 0.939 | 0.045 | 0.074 |
| Iteration 2 | 0.949 | 0.045 | 0.070 |
| Iteration 3 | 0.954 | 0.042 | 0.069 |
| Iteration 4 | 0.955 | 0.041 | 0.068 |
| Iteration 5 | 0.948 | 0.045 | 0.069 |
| Iteration 6 | 0.945 | 0.043 | 0.068 |
| Iteration 7 | 0.958 | 0.044 | 0.070 |
| Iteration 8 | 0.938 | 0.047 | 0.072 |
| Iteration 9 | 0.956 | 0.041 | 0.067 |
| Iteration 10 | 0.958 | 0.042 | 0.069 |

Abbreviations: CFA, confirmatory factor analysis; CFI, comparative fit index; RMSEA, root

mean square error of approximation; SRMR, standardized root mean squared residual.

## Supplementary Table 4. Standardized Factor Loadings of ELAs for the 5-Factor Solution.

| **Variables** | **F1** | **F2** | **F3** | **F4** | **F5** |
| --- | --- | --- | --- | --- | --- |
| asr_scr_adhd_r | -0.005 | -0.007 | 0.009 | **0.895** | -0.047 |
| asr_scr_antisocial_r | 0.031 | 0.214 | 0.000 | **0.580** | 0.044 |
| asr_scr_anxdisord_r | 0.012 | -0.005 | -0.033 | **0.658** | 0.069 |
| asr_scr_avoidant_r | -0.011 | 0.000000 | 0.015 | **0.650** | 0.015 |
| asr_scr_depress_r | -0.004 | -0.028 | -0.005 | **0.838** | 0.017 |
| asr_scr_hyperactive_r | 0.007 | 0.016 | 0.005 | **0.759** | -0.030 |
| asr_scr_inattention_r | -0.003 | 0.004 | 0.012 | **0.760** | -0.040 |
| asr_scr_somaticpr_r | 0.021 | -0.038 | -0.002 | **0.551** | 0.130 |
| famhx_ss_fath_prob_alc_p | **0.553** | 0.022 | 0.005 | 0.048 | 0.075 |
| famhx_ss_fath_prob_dg_p | 0.315 | 0.000 | 0.013 | 0.084 | 0.118 |
| famhx4a_p_1 | **0.948** | -0.01 | 0.025 | 0.008 | -0.033 |
| famhx4a_p_3 | **0.841** | 0.013 | 0.009 | -0.048 | 0.040 |
| famhx4a_p_6 | **0.935** | 0.034 | -0.021 | 0.025 | 0.032 |
| demo_prim | -0.013 | 0.024 | -0.01 | -0.037 | -0.074 |
| demo_prnt_marital_v2 | 0.141 | 0.02 | -0.02 | -0.039 | **0.518** |
| neighborhood_crime_y | -0.063 | 0.038 | 0.166 | -0.005 | 0.382 |
| neighborhood1r_p | -0.102 | 0.018 | -0.01 | 0.08 | **0.482** |
| neighborhood2r_p | -0.116 | 0.054 | -0.016 | 0.037 | **0.580** |
| neighborhood3r_p | -0.105 | 0.055 | -0.017 | 0.074 | **0.502** |
| crpbi_caregiver12_y | 0.127 | -0.063 | **0.539** | 0.014 | -0.073 |
| crpbi_caregiver13_y | 0.072 | -0.014 | **0.503** | -0.01 | 0.012 |
| crpbi_caregiver14_y | 0.086 | -0.062 | **0.582** | 0.021 | -0.046 |
| crpbi_caregiver15_y | 0.081 | -0.014 | **0.501** | 0.001 | -0.029 |
| crpbi_caregiver16_y | 0.102 | -0.037 | **0.471** | 0.014 | -0.057 |
| crpbi_parent1_y | -0.041 | 0.001 | **0.504** | -0.009 | -0.024 |
| crpbi_parent2_y | -0.100 | 0.020 | **0.495** | 0.000 | 0.092 |
| crpbi_parent3_y | -0.060 | 0.023 | **0.536** | -0.012 | -0.022 |
| crpbi_parent4_y | -0.096 | 0.023 | 0.444 | -0.006 | 0.024 |
| crpbi_parent5_y | -0.069 | 0.024 | **0.486** | 0.003 | 0.017 |
| fam_enviro1_p | 0.094 | **0.718** | 0.012 | 0.128 | -0.107 |
| fam_enviro2r_p | 0.037 | **0.719** | 0.005 | -0.105 | -0.059 |
| fam_enviro3_p | -0.04 | **0.654** | -0.003 | 0.070 | 0.041 |
| fam_enviro4r_p | 0.025 | **0.787** | -0.02 | -0.042 | -0.062 |
| fam_enviro5_p | 0.004 | **0.593** | -0.006 | 0.089 | 0.081 |
| fam_enviro6_p | -0.075 | **0.660** | 0.009 | -0.007 | 0.141 |
| fam_enviro7r_p | 0.021 | 0.338 | 0.016 | -0.013 | -0.011 |
| fam_enviro8_p | 0.026 | **0.469** | 0.008 | 0.055 | 0.186 |
| fam_enviro9r_p | 0.045 | 0.152 | 0.014 | 0.090 | -0.196 |
| fes_youth_q1 | 0.013 | 0.106 | 0.241 | 0.039 | 0.045 |
| fes_youth_q2 | 0.012 | 0.065 | 0.157 | -0.004 | 0.084 |
| fes_youth_q3 | -0.084 | 0.240 | 0.216 | -0.038 | 0.191 |
| fes_youth_q4 | -0.036 | 0.132 | 0.208 | 0.002 | 0.023 |
| fes_youth_q5 | -0.021 | 0.195 | 0.297 | -0.028 | 0.097 |
| fes_youth_q6 | -0.052 | 0.072 | 0.179 | 0.014 | 0.050 |
| fes_youth_q7 | -0.062 | 0.121 | 0.374 | 0.005 | 0.101 |
| fes_youth_q8 | -0.020 | 0.089 | 0.148 | 0.015 | 0.053 |
| fes_youth_q9 | 0.001 | 0.0250 | 0.210 | -0.013 | 0.009 |
| kbi_p_c_bully | 0.011 | -0.002 | 0.021 | 0.091 | 0.054 |
| ksads_bully_raw_26 | 0.008 | -0.016 | 0.062 | 0.067 | 0.150 |
| reshist_addr1_adi_wsum | 0.039 | -0.017 | 0.002 | 0.025 | **0.513** |
| demo_fam_exp1_v2 | 0.062 | 0.027 | 0.007 | 0.125 | 0.306 |
| demo_fam_exp2_v2 | 0.015 | 0.030 | -0.013 | 0.089 | 0.320 |
| demo_fam_exp3_v2 | 0.087 | 0.022 | -0.012 | 0.117 | 0.315 |
| demo_fam_exp5_v2 | 0.019 | 0.016 | -0.001 | 0.114 | 0.243 |
| demo_fam_exp6_v2 | 0.179 | 0.009 | 0.034 | 0.256 | 0.259 |
| demo_fam_exp7_v2 | 0.052 | -0.008 | 0.021 | 0.196 | 0.234 |
| demo_comb_income_v2 | -0.029 | -0.011 | -0.002 | 0.027 | **-0.811** |
| demo_prnt_ed_v2 | -0.021 | 0.037 | 0.004 | 0.01 | **-0.671** |
| demo_prtnr_ed_v2 | -0.127 | 0.066 | -0.002 | 0.025 | **-0.699** |
| ksads_ptsd_raw_766_p | 0.145 | 0.061 | 0.008 | 0.105 | 0.147 |
| ksads_ptsd_raw_770_p | 0.090 | -0.020 | -0.008 | 0.127 | 0.086 |
| kbi_p_c_live_full_time | 0.255 | -0.103 | -0.007 | 0.026 | -0.071 |
| parent_monitor_q1_y | -0.132 | 0.076 | 0.310 | -0.006 | 0.094 |
| parent_monitor_q2_y | -0.141 | 0.043 | 0.263 | -0.008 | 0.161 |
| parent_monitor_q3_y | -0.132 | 0.018 | 0.250 | -0.006 | 0.109 |
| parent_monitor_q4_y | -0.035 | -0.025 | 0.359 | 0.040 | -0.051 |
| parent_monitor_q5_y | 0.018 | -0.016 | 0.247 | 0.018 | 0.144 |

## Supplementary Table 5. The Associations of ELA Factors and Brain Network Controllability.

| **Controllability** | **ELA factor** | **estimate** | **se** | **statistic** | **p.value** | **p.fdr** |
| --- | --- | --- | --- | --- | --- | --- |
| CBL | F1 | 0.020 | 0.010 | 2.061 | 0.039 | 0.098 |
| DMN | F1 | 0.008 | 0.011 | 0.722 | 0.470 | 0.559 |
| FP | F1 | 0.020 | 0.011 | 1.905 | 0.057 | 0.114 |
| MF | F1 | 0.036 | 0.010 | 3.576 | 0.000 | **0.004** |
| Mot | F1 | 0.028 | 0.010 | 2.826 | 0.005 | **0.016** |
| SAL | F1 | 0.031 | 0.010 | 3.011 | 0.003 | **0.013** |
| SC | F1 | 0.013 | 0.009 | 1.440 | 0.150 | 0.250 |
| Vas | F1 | 0.012 | 0.009 | 1.334 | 0.182 | 0.260 |
| Vis I | F1 | 0.005 | 0.008 | 0.670 | 0.503 | 0.559 |
| Vis II | F1 | -0.005 | 0.009 | -0.494 | 0.621 | 0.621 |
| CBL | F2 | -0.007 | 0.010 | -0.746 | 0.455 | 0.467 |
| DMN | F2 | 0.008 | 0.011 | 0.728 | 0.467 | 0.467 |
| FP | F2 | 0.016 | 0.010 | 1.556 | 0.120 | 0.299 |
| MF | F2 | 0.025 | 0.010 | 2.538 | 0.011 | 0.090 |
| Mot | F2 | 0.013 | 0.010 | 1.365 | 0.172 | 0.301 |
| SAL | F2 | 0.024 | 0.010 | 2.365 | 0.018 | 0.090 |
| SC | F2 | 0.012 | 0.009 | 1.253 | 0.210 | 0.301 |
| Vas | F2 | 0.015 | 0.009 | 1.634 | 0.102 | 0.299 |
| Vis I | F2 | 0.007 | 0.008 | 0.869 | 0.385 | 0.467 |
| Vis II | F2 | -0.012 | 0.009 | -1.310 | 0.190 | 0.301 |
| CBL | F3 | 0.001 | 0.009 | 0.125 | 0.900 | 0.911 |
| DMN | F3 | 0.007 | 0.011 | 0.700 | 0.484 | 0.806 |
| FP | F3 | 0.009 | 0.010 | 0.829 | 0.407 | 0.806 |
| MF | F3 | -0.003 | 0.010 | -0.266 | 0.791 | 0.911 |
| Mot | F3 | 0.001 | 0.010 | 0.112 | 0.911 | 0.911 |
| SAL | F3 | 0.008 | 0.010 | 0.743 | 0.457 | 0.806 |
| SC | F3 | -0.003 | 0.009 | -0.360 | 0.719 | 0.911 |
| Vas | F3 | 0.009 | 0.009 | 0.984 | 0.325 | 0.806 |
| Vis I | F3 | -0.010 | 0.008 | -1.296 | 0.195 | 0.806 |
| Vis II | F3 | -0.011 | 0.009 | -1.238 | 0.216 | 0.806 |
| CBL | F4 | 0.024 | 0.010 | 2.478 | 0.013 | 0.022 |
| DMN | F4 | 0.017 | 0.011 | 1.625 | 0.104 | 0.125 |
| FP | F4 | 0.030 | 0.010 | 2.875 | 0.004 | **0.008** |
| MF | F4 | 0.041 | 0.010 | 4.096 | 0.000 | **0.000** |
| Mot | F4 | 0.031 | 0.010 | 3.188 | 0.001 | **0.004** |
| SAL | F4 | 0.047 | 0.010 | 4.601 | 0.000 | **0.000** |
| SC | F4 | 0.018 | 0.009 | 1.889 | 0.059 | 0.084 |
| Vas | F4 | 0.033 | 0.009 | 3.652 | 0.000 | **0.001** |
| Vis I | F4 | 0.013 | 0.008 | 1.586 | 0.113 | 0.125 |
| Vis II | F4 | 0.002 | 0.009 | 0.229 | 0.819 | 0.819 |
| CBL | F5 | 0.057 | 0.013 | 4.513 | 0.000 | **0.000** |
| DMN | F5 | 0.019 | 0.014 | 1.351 | 0.177 | 0.187 |
| FP | F5 | 0.033 | 0.014 | 2.386 | 0.017 | 0.056 |
| MF | F5 | 0.030 | 0.013 | 2.277 | 0.023 | 0.056 |
| Mot | F5 | 0.024 | 0.013 | 1.836 | 0.066 | 0.111 |
| SAL | F5 | 0.039 | 0.013 | 2.903 | 0.004 | **0.019** |
| SC | F5 | 0.016 | 0.012 | 1.320 | 0.187 | 0.187 |
| Vas | F5 | 0.026 | 0.012 | 2.198 | 0.028 | 0.056 |
| Vis I | F5 | 0.017 | 0.011 | 1.589 | 0.112 | 0.160 |
| Vis II | F5 | 0.018 | 0.012 | 1.457 | 0.145 | 0.181 |

Abbreviations: CBL, cerebellar network, DMN, default mode network, F1: Paternal psychosocial adversity, F2: Family conflict/hostile environment, F3: Low caregiver and emotional support, F4: Caregiver psychopathology, F5: Socioeconomic disadvantages, FP, frontoparietal network, MF, medial frontal network, Mot, motor network, SAL, salience network, SC, subcortical network, Vas, visual association network, Vis I, visual network I, Vis II, visual network II.

## Supplementary Table 6. The Associations of ELA Factors and Behavioral Outcomes.

| **Outcome** | **ELA factor** | **estimate** | **se** | **statistic** | **p.value** | **p.fdr** |
| --- | --- | --- | --- | --- | --- | --- |
| CBCL External | F1 | 0.245 | 0.011 | 22.275 | **< 0.001** | **< 0.001** |
| CBCL External | F2 | 0.421 | 0.010 | 41.330 | **< 0.001** | **< 0.001** |
| CBCL External | F3 | 0.118 | 0.011 | 10.652 | 2.58E-26 | **7.73E-26** |
| CBCL External | F4 | 0.469 | 0.010 | 47.075 | **< 0.001** | **< 0.001** |
| CBCL External | F5 | 0.266 | 0.014 | 18.559 | 3.83E-75 | **2.30E-74** |
| CBCL Internal | F1 | 0.219 | 0.011 | 19.759 | 7.65E-85 | **1.53E-84** |
| CBCL Internal | F2 | 0.318 | 0.011 | 29.860 | **< 0.001** | **< 0.001** |
| CBCL Internal | F3 | 0.091 | 0.011 | 8.241 | 1.98E-16 | **3.97E-16** |
| CBCL Internal | F4 | 0.513 | 0.010 | 52.907 | **< 0.001** | **< 0.001** |
| CBCL Internal | F5 | 0.203 | 0.015 | 13.960 | 9.57E-44 | **1.91E-43** |
| CBCL TotalProb | F1 | 0.254 | 0.011 | 23.278 | **< 0.001** | **< 0.001** |
| CBCL TotalProb | F2 | 0.407 | 0.010 | 39.874 | **< 0.001** | **< 0.001** |
| CBCL TotalProb | F3 | 0.121 | 0.011 | 11.027 | 4.55E-28 | **2.73E-27** |
| CBCL TotalProb | F4 | 0.564 | 0.009 | 60.902 | **< 0.001** | **< 0.001** |
| CBCL TotalProb | F5 | 0.260 | 0.014 | 18.104 | 9.31E-72 | **2.79E-71** |
| NIH CrystComp | F1 | -0.047 | 0.011 | -4.193 | 2.78E-05 | **4.18E-05** |
| NIH CrystComp | F2 | -0.058 | 0.011 | -5.164 | 2.47E-07 | **3.71E-07** |
| NIH CrystComp | F3 | -0.037 | 0.011 | -3.313 | 9.27E-04 | **1.11E-03** |
| NIH CrystComp | F4 | -0.009 | 0.011 | -0.790 | 4.29E-01 | 4.29E-01 |
| NIH CrystComp | F5 | -0.149 | 0.015 | -10.212 | 2.55E-24 | **3.06E-24** |
| NIH FluidComp | F1 | -0.031 | 0.011 | -2.707 | 6.80E-03 | **6.80E-03** |
| NIH FluidComp | F2 | -0.029 | 0.011 | -2.536 | 1.12E-02 | **1.12E-02** |
| NIH FluidComp | F3 | -0.029 | 0.011 | -2.563 | 1.04E-02 | **1.04E-02** |
| NIH FluidComp | F4 | -0.020 | 0.011 | -1.711 | 8.71E-02 | 1.31E-01 |
| NIH FluidComp | F5 | -0.120 | 0.015 | -8.138 | 4.71E-16 | **4.71E-16** |
| NIH TotalComp | F1 | -0.047 | 0.011 | -4.113 | 3.94E-05 | **4.73E-05** |
| NIH TotalComp | F2 | -0.053 | 0.011 | -4.701 | 2.64E-06 | **3.16E-06** |
| NIH TotalComp | F3 | -0.042 | 0.011 | -3.729 | 1.94E-04 | **2.90E-04** |
| NIH TotalComp | F4 | -0.017 | 0.011 | -1.483 | 1.38E-01 | 1.66E-01 |
| NIH TotalComp | F5 | -0.167 | 0.015 | -11.430 | 5.33E-30 | **7.99E-30** |

Abbreviations: F1: Paternal psychosocial adversity, F2: Family conflict/hostile environment, F3: Low caregiver and emotional support, F4: Caregiver psychopathology, F5: Socioeconomic disadvantages.

## Supplementary Table 7. The Associations of Brain Network Controllability and Behavioral Measures.

| **Behavior** | **Controllability** | **estimate** | **se** | **statistic** | **p.value** | **p.fdr** |
| --- | --- | --- | --- | --- | --- | --- |
| CBCL External | CBL | 0.003 | 0.013 | 0.260 | 0.795 | 0.964 |
| CBCL External | DMN | 0.022 | 0.012 | 1.843 | 0.065 | 0.078 |
| CBCL External | FP | 0.025 | 0.012 | 2.045 | 0.041 | **0.049** |
| CBCL External | MF | 0.044 | 0.013 | 3.491 | 0.000 | **0.001** |
| CBCL External | Mot | 0.028 | 0.013 | 2.180 | 0.029 | **0.029** |
| CBCL External | SAL | 0.030 | 0.012 | 2.479 | 0.013 | **0.026** |
| CBCL External | SC | 0.011 | 0.013 | 0.803 | 0.422 | 0.483 |
| CBCL External | Vas | 0.014 | 0.014 | 1.043 | 0.297 | 0.297 |
| CBCL External | Vis I | -0.026 | 0.015 | -1.747 | 0.081 | 0.243 |
| CBCL External | Vis II | -0.024 | 0.013 | -1.788 | 0.074 | 0.443 |
| CBCL Internal | CBL | 0.006 | 0.013 | 0.494 | 0.621 | 0.964 |
| CBCL Internal | DMN | 0.033 | 0.012 | 2.786 | 0.005 | **0.017** |
| CBCL Internal | FP | 0.031 | 0.012 | 2.525 | 0.012 | **0.017** |
| CBCL Internal | MF | 0.043 | 0.013 | 3.369 | 0.001 | **0.001** |
| CBCL Internal | Mot | 0.036 | 0.013 | 2.810 | 0.005 | **0.007** |
| CBCL Internal | SAL | 0.019 | 0.012 | 1.525 | 0.127 | 0.153 |
| CBCL Internal | SC | 0.009 | 0.013 | 0.702 | 0.483 | 0.483 |
| CBCL Internal | Vas | 0.030 | 0.014 | 2.140 | 0.032 | 0.065 |
| CBCL Internal | Vis I | 0.003 | 0.015 | 0.203 | 0.839 | 0.839 |
| CBCL Internal | Vis II | 0.003 | 0.013 | 0.218 | 0.827 | 0.914 |
| CBCL TotalProb | CBL | 0.001 | 0.013 | 0.076 | 0.940 | 0.964 |
| CBCL TotalProb | DMN | 0.033 | 0.012 | 2.760 | 0.006 | **0.017** |
| CBCL TotalProb | FP | 0.031 | 0.012 | 2.568 | 0.010 | **0.017** |
| CBCL TotalProb | MF | 0.052 | 0.013 | 4.159 | 0.000 | **0.000** |
| CBCL TotalProb | Mot | 0.044 | 0.013 | 3.461 | 0.001 | **0.001** |
| CBCL TotalProb | SAL | 0.032 | 0.012 | 2.657 | 0.008 | **0.026** |
| CBCL TotalProb | SC | 0.020 | 0.013 | 1.503 | 0.133 | 0.266 |
| CBCL TotalProb | Vas | 0.025 | 0.014 | 1.777 | 0.076 | 0.091 |
| CBCL TotalProb | Vis I | -0.006 | 0.015 | -0.428 | 0.668 | 0.839 |
| CBCL TotalProb | Vis II | -0.009 | 0.013 | -0.653 | 0.514 | 0.914 |

Abbreviations: CBL, cerebellar network, DMN, default mode network, FP, frontoparietal network, MF, medial frontal network, Mot, motor network, SAL, salience network, SC, subcortical network, Vas, visual association network, Vis I, visual network I, Vis II, visual network II.

## Supplementary Table 8. The Associations of Brain Network Controllability and Cognitive measures.

| **Cognitive** | **Controllability** | **estimate** | **se** | **statistic** | **p.value** | **p.fdr** |
| --- | --- | --- | --- | --- | --- | --- |
| NIH CrystComp | CBL | -0.008 | 0.013 | -0.594 | 0.553 | 0.964 |
| NIH CrystComp | DMN | -0.027 | 0.012 | -2.322 | 0.020 | **0.037** |
| NIH CrystComp | FP | -0.023 | 0.012 | -1.953 | 0.051 | 0.051 |
| NIH CrystComp | MF | -0.047 | 0.013 | -3.72 | 0.000 | **0.000** |
| NIH CrystComp | Mot | -0.034 | 0.013 | -2.697 | 0.007 | **0.008** |
| NIH CrystComp | SAL | -0.013 | 0.012 | -1.065 | 0.287 | 0.287 |
| NIH CrystComp | SC | -0.010 | 0.013 | -0.761 | 0.447 | 0.483 |
| NIH CrystComp | Vas | -0.026 | 0.014 | -1.941 | 0.052 | 0.079 |
| NIH CrystComp | Vis I | 0.013 | 0.014 | 0.942 | 0.346 | 0.693 |
| NIH CrystComp | Vis II | 0.001 | 0.013 | 0.109 | 0.914 | 0.914 |
| NIH FluidComp | CBL | -0.001 | 0.013 | -0.045 | 0.964 | 0.964 |
| NIH FluidComp | DMN | -0.019 | 0.012 | -1.614 | 0.107 | 0.107 |
| NIH FluidComp | FP | -0.042 | 0.012 | -3.498 | 0.000 | **0.003** |
| NIH FluidComp | MF | -0.039 | 0.013 | -3.084 | 0.002 | **0.002** |
| NIH FluidComp | Mot | -0.050 | 0.013 | -3.911 | 0.000 | **0.000** |
| NIH FluidComp | SAL | -0.032 | 0.012 | -2.601 | 0.009 | **0.026** |
| NIH FluidComp | SC | -0.041 | 0.013 | -3.080 | 0.002 | **0.013** |
| NIH FluidComp | Vas | -0.036 | 0.014 | -2.592 | 0.010 | **0.029** |
| NIH FluidComp | Vis I | -0.027 | 0.015 | -1.860 | 0.063 | 0.243 |
| NIH FluidComp | Vis II | -0.003 | 0.013 | -0.188 | 0.851 | 0.914 |
| NIH TotalComp | CBL | -0.006 | 0.013 | -0.427 | 0.669 | 0.964 |
| NIH TotalComp | DMN | -0.027 | 0.012 | -2.248 | 0.025 | **0.037** |
| NIH TotalComp | FP | -0.039 | 0.012 | -3.215 | 0.001 | **0.004** |
| NIH TotalComp | MF | -0.052 | 0.013 | -4.102 | 0.000 | **0.000** |
| NIH TotalComp | Mot | -0.049 | 0.013 | -3.836 | 0.000 | **0.000** |
| NIH TotalComp | SAL | -0.024 | 0.012 | -1.998 | 0.046 | 0.069 |
| NIH TotalComp | SC | -0.030 | 0.013 | -2.246 | 0.025 | 0.074 |
| NIH TotalComp | Vas | -0.041 | 0.014 | -2.946 | 0.003 | **0.020** |
| NIH TotalComp | Vis I | -0.005 | 0.015 | -0.365 | 0.715 | 0.839 |
| NIH TotalComp | Vis II | -0.001 | 0.013 | -0.111 | 0.911 | 0.914 |

Abbreviations: CBL, cerebellar network, DMN, default mode network, FP, frontoparietal network, MF, medial frontal network, Mot, motor network, SAL, salience network, SC, subcortical network, Vas, visual association network, Vis I, visual network I, Vis II, visual network II.

## Supplementary Table 9. Interaction Effects Between ELA Factors and Ancestry on Brain Network Controllability.

| **Controllability** | **ELA factor** | **estimate** | **se** | **statistic** | **p.value** | **p.fdr** |
| --- | --- | --- | --- | --- | --- | --- |
| CBL | F1 | -0.007 | 0.019 | -0.343 | 0.731 | 0.917 |
| DMN | F1 | 0.026 | 0.021 | 1.204 | 0.229 | 0.492 |
| FP | F1 | 0.037 | 0.021 | 1.778 | 0.075 | 0.309 |
| MF | F1 | 0.016 | 0.020 | 0.805 | 0.421 | 0.690 |
| Mot | F1 | 0.005 | 0.020 | 0.245 | 0.807 | 0.917 |
| SAL | F1 | 0.005 | 0.021 | 0.265 | 0.791 | 0.917 |
| SC | F1 | 0.026 | 0.019 | 1.387 | 0.165 | 0.469 |
| Vas | F1 | 0.039 | 0.018 | 2.182 | 0.029 | 0.182 |
| Vis I | F1 | 0.019 | 0.016 | 1.164 | 0.245 | 0.492 |
| Vis II | F1 | 0.025 | 0.018 | 1.366 | 0.172 | 0.469 |
| CBL | F2 | 0.008 | 0.019 | 0.430 | 0.667 | 0.890 |
| DMN | F2 | 0.013 | 0.021 | 0.623 | 0.534 | 0.785 |
| FP | F2 | 0.021 | 0.021 | 1.026 | 0.305 | 0.586 |
| MF | F2 | 0.016 | 0.020 | 0.823 | 0.411 | 0.690 |
| Mot | F2 | 0.026 | 0.020 | 1.318 | 0.188 | 0.469 |
| SAL | F2 | 0.011 | 0.020 | 0.548 | 0.584 | 0.834 |
| SC | F2 | 0.031 | 0.018 | 1.694 | 0.090 | 0.322 |
| Vas | F2 | -0.005 | 0.018 | -0.280 | 0.779 | 0.917 |
| Vis I | F2 | 0.015 | 0.016 | 0.905 | 0.366 | 0.647 |
| Vis II | F2 | 0.032 | 0.018 | 1.766 | 0.077 | 0.309 |
| CBL | F3 | -0.016 | 0.019 | -0.868 | 0.385 | 0.664 |
| DMN | F3 | -0.015 | 0.021 | -0.695 | 0.487 | 0.738 |
| FP | F3 | -0.005 | 0.021 | -0.256 | 0.798 | 0.917 |
| MF | F3 | 0.003 | 0.020 | 0.177 | 0.859 | 0.955 |
| Mot | F3 | 0.002 | 0.019 | 0.091 | 0.927 | 0.996 |
| SAL | F3 | -0.024 | 0.020 | -1.181 | 0.238 | 0.492 |
| SC | F3 | 0.000 | 0.018 | 0.005 | 0.996 | 0.996 |
| Vas | F3 | 0.017 | 0.018 | 0.957 | 0.338 | 0.627 |
| Vis I | F3 | 0.005 | 0.016 | 0.334 | 0.738 | 0.917 |
| Vis II | F3 | 0.017 | 0.018 | 0.937 | 0.349 | 0.634 |
| CBL | F4 | 0.034 | 0.019 | 1.806 | 0.071 | 0.309 |
| DMN | F4 | 0.028 | 0.021 | 1.326 | 0.185 | 0.469 |
| FP | F4 | 0.050 | 0.021 | 2.415 | 0.016 | 0.123 |
| MF | F4 | 0.037 | 0.020 | 1.866 | 0.062 | 0.301 |
| Mot | F4 | 0.032 | 0.020 | 1.637 | 0.102 | 0.339 |
| SAL | F4 | 0.028 | 0.020 | 1.351 | 0.177 | 0.469 |
| SC | F4 | 0.044 | 0.018 | 2.408 | 0.016 | 0.123 |
| Vas | F4 | 0.016 | 0.018 | 0.899 | 0.369 | 0.647 |
| Vis I | F4 | 0.036 | 0.016 | 2.241 | 0.025 | 0.179 |
| Vis II | F4 | 0.037 | 0.018 | 2.044 | 0.041 | 0.238 |
| CBL | F5 | 0.068 | 0.024 | 2.805 | 0.005 | 0.056 |
| DMN | F5 | 0.116 | 0.027 | 4.308 | 0.000 | **0.001** |
| FP | F5 | 0.136 | 0.026 | 5.142 | 0.000 | **0.000** |
| MF | F5 | 0.103 | 0.025 | 4.087 | 0.000 | **0.001** |
| Mot | F5 | 0.081 | 0.025 | 3.243 | 0.001 | **0.017** |
| SAL | F5 | 0.089 | 0.026 | 3.408 | 0.001 | **0.011** |
| SC | F5 | 0.084 | 0.023 | 3.600 | 0.000 | **0.006** |
| Vas | F5 | 0.060 | 0.023 | 2.663 | 0.008 | 0.078 |
| Vis I | F5 | 0.080 | 0.021 | 3.869 | 0.000 | **0.003** |
| Vis II | F5 | 0.068 | 0.023 | 2.917 | 0.004 | **0.044** |

Abbreviations: CBL, cerebellar network, DMN, default mode network, F1: Paternal psychosocial adversity, F2: Family conflict/hostile environment, F3: Low caregiver and emotional support, F4: Caregiver psychopathology, F5: Socioeconomic disadvantages, FP, frontoparietal network, MF, medial frontal network, Mot, motor network, SAL, salience network, SC, subcortical network, Vas, visual association network, Vis I, visual network I, Vis II, visual network II.

## Supplementary Table 10. Mediation Results among ELA Factors, Brain Controllability and Behavioral measures.

| **Pathway** | **indirectestimate** | **se** | **p.value** | **95% CI.lower** | **95% CI.upper** | **PM (%)** |
| --- | --- | --- | --- | --- | --- | --- |
| F1→FP→CBCL External | 0.00036 | 0.00034 | 0.28495 | -0.00009 | 0.00120 | 1.036% |
| F1→MF→CBCL External | 0.00116 | 0.00054 | **0.03118** | 0.00028 | 0.00242 | 0.153% |
| F1→Mot→CBCL External | 0.00045 | 0.00040 | 0.25536 | -0.00012 | 0.00137 | 0.674% |
| F1→SAL→CBCL External | 0.00054 | 0.00040 | 0.17562 | -0.00009 | 0.00148 | 5.799% |
| F1→Vas→CBCL External | 0.00016 | 0.00025 | 0.51693 | -0.00021 | 0.00080 | 0.149% |
| F4→FP→CBCL External | 0.00025 | 0.00035 | 0.48323 | -0.00036 | 0.00112 | 0.218% |
| F4→MF→CBCL External | 0.00087 | 0.00051 | 0.08735 | 0.00003 | 0.00204 | 0.069% |
| F4→Mot→CBCL External | 0.00023 | 0.00036 | 0.53084 | -0.00041 | 0.00106 | 0.428% |
| F4→SAL→CBCL External | 0.00007 | 0.00049 | 0.88982 | -0.00088 | 0.00110 | 0.613% |
| F4→Vas→CBCL External | -0.00017 | 0.00044 | 0.69093 | -0.00108 | 0.00073 | 0.254% |
| F5→FP→CBCL External | 0.00043 | 0.00037 | 0.24153 | -0.00006 | 0.00142 | 0.407% |
| F5→MF→CBCL External | 0.00076 | 0.00052 | 0.14319 | -0.00003 | 0.00198 | 9.479% |
| F5→Mot→CBCL External | 0.00032 | 0.00033 | 0.33868 | -0.00016 | 0.00114 | 0.387% |
| F5→SAL→CBCL External | 0.00048 | 0.00037 | 0.19676 | -0.00003 | 0.00135 | 0.055% |
| F5→Vas→CBCL External | 0.00023 | 0.00030 | 0.45343 | -0.00022 | 0.00097 | 0.255% |
| F1→FP→CBCL Internal | 0.00054 | 0.00039 | 0.17000 | -0.00009 | 0.00148 | 8.766% |
| F1→MF→CBCL Internal | 0.00122 | 0.00057 | **0.03297** | 0.00030 | 0.00240 | 0.260% |
| F1→Mot→CBCL Internal | 0.00078 | 0.00049 | 0.11465 | 0.00004 | 0.00191 | 7.254% |
| F1→SAL→CBCL Internal | 0.00028 | 0.00038 | 0.45723 | -0.00041 | 0.00122 | 0.372% |
| F1→Vas→CBCL Internal | 0.00036 | 0.00035 | 0.30452 | -0.00017 | 0.00126 | 0.211% |
| F4→FP→CBCL Internal | 0.00047 | 0.00037 | 0.20673 | -0.00014 | 0.00129 | 13.088% |
| F4→MF→CBCL Internal | 0.00080 | 0.00051 | 0.11428 | -0.00005 | 0.00197 | 0.072% |
| F4→Mot→CBCL Internal | 0.00054 | 0.00040 | 0.17531 | -0.00010 | 0.00149 | -0.004% |
| F4→SAL→CBCL Internal | -0.00049 | 0.00050 | 0.31883 | -0.00150 | 0.00052 | 0.429% |
| F4→Vas→CBCL Internal | 0.00027 | 0.00042 | 0.51298 | -0.00046 | 0.00124 | 0.423% |
| F5→FP→CBCL Internal | 0.00064 | 0.00044 | 0.14245 | 0.00001 | 0.00166 | 0.192% |
| F5→MF→CBCL Internal | 0.00078 | 0.00055 | 0.15275 | -0.00003 | 0.00212 | 0.108% |
| F5→Mot→CBCL Internal | 0.00050 | 0.00044 | 0.25596 | -0.00020 | 0.00157 | 0.626% |
| F5→SAL→CBCL Internal | 0.00030 | 0.00033 | 0.37042 | -0.00020 | 0.00110 | 0.745% |
| F5→Vas→CBCL Internal | 0.00050 | 0.00039 | 0.20006 | -0.00008 | 0.00138 | -0.005% |
| F1→FP→CBCL TotalProb | 0.00051 | 0.00039 | 0.18772 | -0.00007 | 0.00146 | -0.038% |
| F1→MF→CBCL TotalProb | 0.00146 | 0.00060 | **0.01595** | 0.00046 | 0.00286 | 0.210% |
| F1→Mot→CBCL TotalProb | 0.00090 | 0.00052 | 0.08141 | 0.00012 | 0.00209 | 1.373% |
| F1→SAL→CBCL TotalProb | 0.00062 | 0.00043 | 0.14743 | -0.00001 | 0.00165 | 0.050% |
| F1→Vas→CBCL TotalProb | 0.00027 | 0.00030 | 0.36072 | -0.00015 | 0.00105 | 0.593% |
| F4→FP→CBCL TotalProb | 0.00039 | 0.00035 | 0.27079 | -0.00017 | 0.00123 | 1.047% |
| F4→MF→CBCL TotalProb | 0.00104 | 0.00051 | **0.04066** | 0.00023 | 0.00227 | 0.601% |
| F4→Mot→CBCL TotalProb | 0.00065 | 0.00040 | 0.10215 | 0.00005 | 0.00164 | 1.982% |
| F4→SAL→CBCL TotalProb | -0.00002 | 0.00048 | 0.96667 | -0.00094 | 0.00104 | 0.804% |
| F4→Vas→CBCL TotalProb | -0.00003 | 0.00038 | 0.94158 | -0.00075 | 0.00077 | 1.025% |
| F5→FP→CBCL TotalProb | 0.00060 | 0.00042 | 0.15357 | 0.00001 | 0.00160 | 0.120% |
| F5→MF→CBCL TotalProb | 0.00092 | 0.00061 | 0.12766 | -0.00005 | 0.00230 | 0.161% |
| F5→Mot→CBCL TotalProb | 0.00057 | 0.00048 | 0.23572 | -0.00026 | 0.00167 | 0.550% |
| F5→SAL→CBCL TotalProb | 0.00055 | 0.00040 | 0.17517 | -0.00002 | 0.00147 | -0.100% |
| F5→Vas→CBCL TotalProb | 0.00037 | 0.00034 | 0.27420 | -0.00010 | 0.00121 | 1.090% |
| F1→FP→NIH CrystComp | -0.00047 | 0.00035 | 0.18064 | -0.00130 | 0.00007 | 6.359% |
| F1→MF→NIH CrystComp | -0.00168 | 0.00063 | **0.00815** | -0.00311 | -0.00056 | 1.061% |
| F1→Mot→NIH CrystComp | -0.00095 | 0.00050 | 0.05860 | -0.00207 | -0.00012 | 0.634% |
| F1→SAL→NIH CrystComp | -0.00028 | 0.00036 | 0.43600 | -0.00112 | 0.00035 | 0.316% |
| F1→Vas→NIH CrystComp | -0.00042 | 0.00037 | 0.25039 | -0.00124 | 0.00025 | 0.853% |
| F4→FP→NIH CrystComp | -0.00075 | 0.00042 | 0.07829 | -0.00169 | -0.00006 | 2.901% |
| F4→MF→NIH CrystComp | -0.00208 | 0.00071 | **0.00345** | -0.00366 | -0.00090 | 3.772% |
| F4→Mot→NIH CrystComp | -0.00114 | 0.00054 | **0.03575** | -0.00241 | -0.00030 | 5.045% |
| F4→SAL→NIH CrystComp | -0.00051 | 0.00055 | 0.36266 | -0.00169 | 0.00057 | 1.052% |
| F4→Vas→NIH CrystComp | -0.00114 | 0.00054 | **0.03315** | -0.00240 | -0.00020 | 4.295% |
| F5→FP→NIH CrystComp | -0.00050 | 0.00037 | 0.17698 | -0.00137 | 0.00005 | 7.271% |
| F5→MF→NIH CrystComp | -0.00092 | 0.00058 | 0.11432 | -0.00219 | 0.00005 | 8.555% |
| F5→Mot→NIH CrystComp | -0.00052 | 0.00044 | 0.24269 | -0.00154 | 0.00018 | 0.569% |
| F5→SAL→NIH CrystComp | -0.00019 | 0.00029 | 0.50590 | -0.00089 | 0.00032 | 0.819% |
| F5→Vas→NIH CrystComp | -0.00054 | 0.00038 | 0.15806 | -0.00140 | 0.00007 | 13.067% |
| F1→FP→NIH FluidComp | -0.00083 | 0.00050 | 0.09915 | -0.00186 | 0.00008 | 0.943% |
| F1→MF→NIH FluidComp | -0.00137 | 0.00058 | **0.01878** | -0.00271 | -0.00039 | 3.045% |
| F1→Mot→NIH FluidComp | -0.00131 | 0.00064 | **0.04097** | -0.00264 | -0.00016 | 1.797% |
| F1→SAL→NIH FluidComp | -0.00079 | 0.00048 | 0.10282 | -0.00190 | -0.00003 | 1.404% |
| F1→Vas→NIH FluidComp | -0.00054 | 0.00046 | 0.24339 | -0.00155 | 0.00031 | 1.312% |
| F4→FP→NIH FluidComp | -0.00127 | 0.00054 | **0.01924** | -0.00244 | -0.00035 | 0.192% |
| F4→MF→NIH FluidComp | -0.00166 | 0.00067 | **0.01366** | -0.00319 | -0.00057 | 0.374% |
| F4→Mot→NIH FluidComp | -0.00153 | 0.00065 | **0.01882** | -0.00308 | -0.00050 | 0.371% |
| F4→SAL→NIH FluidComp | -0.00127 | 0.00066 | 0.05405 | -0.00284 | -0.00012 | 0.256% |
| F4→Vas→NIH FluidComp | -0.00143 | 0.00059 | **0.01496** | -0.00271 | -0.00045 | 2.127% |
| F5→FP→NIH FluidComp | -0.00089 | 0.00053 | 0.08914 | -0.00208 | -0.00004 | 0.173% |
| F5→MF→NIH FluidComp | -0.00074 | 0.00051 | 0.14675 | -0.00197 | 0.00004 | 14.631% |
| F5→Mot→NIH FluidComp | -0.00072 | 0.00058 | 0.21626 | -0.00204 | 0.00030 | 8.187% |
| F5→SAL→NIH FluidComp | -0.00056 | 0.00041 | 0.17434 | -0.00162 | 0.00002 | 0.015% |
| F5→Vas→NIH FluidComp | -0.00070 | 0.00048 | 0.14279 | -0.00180 | 0.00011 | 23.859% |
| F1→FP→NIH TotalComp | -0.00077 | 0.00047 | 0.10623 | -0.00179 | 0.00007 | 0.055% |
| F1→MF→NIH TotalComp | -0.00183 | 0.00067 | **0.00608** | -0.00334 | -0.00064 | 0.497% |
| F1→Mot→NIH TotalComp | -0.00131 | 0.00063 | **0.03813** | -0.00266 | -0.00016 | 0.584% |
| F1→SAL→NIH TotalComp | -0.00059 | 0.00043 | 0.17408 | -0.00163 | 0.00009 | 10.110% |
| F1→Vas→NIH TotalComp | -0.00060 | 0.00049 | 0.22369 | -0.00166 | 0.00033 | 0.283% |
| F4→FP→NIH TotalComp | -0.00119 | 0.00052 | **0.02212** | -0.00228 | -0.00032 | 4.826% |
| F4→MF→NIH TotalComp | -0.00224 | 0.00075 | **0.00295** | -0.00402 | -0.00100 | 3.071% |
| F4→Mot→NIH TotalComp | -0.00155 | 0.00066 | **0.01855** | -0.00306 | -0.00055 | 0.229% |
| F4→SAL→NIH TotalComp | -0.00098 | 0.00062 | 0.11572 | -0.00238 | 0.00014 | 7.750% |
| F4→Vas→NIH TotalComp | -0.00161 | 0.00061 | **0.00836** | -0.00296 | -0.00057 | 0.135% |
| F5→FP→NIH TotalComp | -0.00082 | 0.00049 | 0.09277 | -0.00186 | -0.00004 | 0.112% |
| F5→MF→NIH TotalComp | -0.00100 | 0.00063 | 0.11350 | -0.00246 | 0.00006 | 0.094% |
| F5→Mot→NIH TotalComp | -0.00072 | 0.00058 | 0.21657 | -0.00211 | 0.00029 | 10.485% |
| F5→SAL→NIH TotalComp | -0.00041 | 0.00036 | 0.25493 | -0.00132 | 0.00011 | 0.498% |
| F5→Vas→NIH TotalComp | -0.00077 | 0.00050 | 0.12206 | -0.00189 | 0.00012 | 0.191% |

Abbreviations: F1: Paternal psychosocial adversity, F4: Caregiver psychopathology, F5: Socioeconomic disadvantages, FP, frontoparietal network, MF, medial frontal network, Mot, motor network, SAL, salience network, Vas, visual association network, PM, proportion mediated.

## Supplementary Table 11. Significant Moderated Results among ELA Factors, Brain controllability and Behavioral Measures in European Ancestry.

| **Pathway** | **Moderator** | **Moderated level** | **Indirect estimate** | **se** | **p.value** | **95% CI.lower** | **95% CI.upper** | **PM (%)** |
| --- | --- | --- | --- | --- | --- | --- | --- | --- |
| F1→MF→CBCL TotalProb | ADHD PRS | Low | 0.00490 | 0.00214 | **0.02215** | 0.00158 | 0.00992 | 1.889% |
| F1→MF→CBCL TotalProb | Medium | 0.00200 | 0.00102 | **0.04904** | 0.00048 | 0.00458 | 0.735% |
| F4→MF→CBCL TotalProb | ADHD PRS | Low | 0.00373 | 0.00184 | **0.04234** | 0.00083 | 0.00778 | 0.649% |
| F5→FP→CBCL TotalProb | ADHD PRS | Low | 0.00642 | 0.00311 | **0.03885** | 0.00171 | 0.01448 | 1.726% |
| F5→FP→CBCL TotalProb | Medium | 0.00437 | 0.00212 | **0.03950** | 0.00082 | 0.00915 | 1.169% |
| F5→MF→CBCL TotalProb | ADHD PRS | Low | 0.00704 | 0.00317 | **0.02655** | 0.00225 | 0.01483 | 1.892% |
| F5→MF→CBCL TotalProb | Medium | 0.00374 | 0.00189 | **0.04775** | 0.00057 | 0.00815 | 1.001% |
| F5→FP→CBCL Internal | ADHD PRS | Medium | 0.00490 | 0.00223 | **0.02830** | 0.00111 | 0.00986 | 1.723% |
| F1→MF→NIH CrystComp | ADHD PRS | Medium | -0.00306 | 0.00123 | **0.01287** | -0.00630 | -0.00122 | 4.965% |
| F4→MF→NIH CrystComp | ADHD PRS | Low | -0.00408 | 0.00206 | **0.04785** | -0.00889 | -0.00084 | -12.658% |
| F4→MF→NIH CrystComp | Medium | -0.00417 | 0.00144 | **0.00380** | -0.00765 | -0.00187 | 13.801% |
| F4→Mot→NIH CrystComp | ADHD PRS | Medium | -0.00256 | 0.00120 | **0.03238** | -0.00574 | -0.00081 | 8.540% |
| F5→MF→NIH CrystComp | ADHD PRS | Medium | -0.00599 | 0.00214 | **0.00521** | -0.01112 | -0.00247 | 3.630% |
| F5→MF→NIH CrystComp | High | -0.00759 | 0.00357 | **0.03349** | -0.01697 | -0.00214 | 3.891% |
| F5→Mot→NIH CrystComp | ADHD PRS | Medium | -0.00357 | 0.00168 | **0.03409** | -0.00788 | -0.00101 | 2.164% |
| F1→MF→NIH TotalComp | ADHD PRS | Medium | -0.00252 | 0.00111 | **0.02317** | -0.00535 | -0.00091 | 4.165% |
| F4→FP→NIH TotalComp | ADHD PRS | Medium | -0.00229 | 0.00114 | **0.04554** | -0.00522 | -0.00057 | 4.200% |
| F4→MF→NIH TotalComp | ADHD PRS | Medium | -0.00335 | 0.00132 | **0.01093** | -0.00651 | -0.00128 | 6.136% |
| F4→Mot→NIH TotalComp | ADHD PRS | Medium | -0.00274 | 0.00123 | **0.02605** | -0.00594 | -0.00088 | 5.039% |
| F4→Vas→NIH TotalComp | ADHD PRS | Medium | -0.00220 | 0.00107 | **0.03925** | -0.00481 | -0.00058 | 4.032% |
| F5→MF→NIH TotalComp | ADHD PRS | Medium | -0.00461 | 0.00197 | **0.01939** | -0.00924 | -0.00147 | 2.292% |
| F5→Mot→NIH TotalComp | ADHD PRS | Medium | -0.00382 | 0.00173 | **0.02680** | -0.00806 | -0.00118 | 1.899% |
| F5→Vas→NIH TotalComp | ADHD PRS | Medium | -0.00352 | 0.00163 | **0.03141** | -0.00784 | -0.00108 | 1.746% |
| F1→MF→CBCL TotalProb | ASD PRS | Medium | 0.00202 | 0.00102 | **0.04769** | 0.00051 | 0.00457 | 0.738% |
| F5→FP→CBCL TotalProb | ASD PRS | Medium | 0.00464 | 0.00217 | **0.03261** | 0.00101 | 0.00956 | 1.242% |
| F5→MF→CBCL TotalProb | ASD PRS | Medium | 0.00404 | 0.00195 | **0.03862** | 0.00074 | 0.00850 | 1.083% |
| F5→FP→CBCL Internal | ASD PRS | Medium | 0.00497 | 0.00227 | **0.02889** | 0.00111 | 0.00993 | 1.763% |
| F1→MF→NIH CrystComp | ASD PRS | Medium | -0.00303 | 0.00122 | **0.01286** | -0.00622 | -0.00120 | 4.853% |
| F1→MF→NIH CrystComp | High | -0.00418 | 0.00210 | **0.04654** | -0.00943 | -0.00087 | 5.713% |
| F4→MF→NIH CrystComp | ASD PRS | Medium | -0.00422 | 0.00145 | **0.00355** | -0.00765 | -0.00191 | 13.998% |
| F4→MF→NIH CrystComp | High | -0.00700 | 0.00265 | **0.00816** | -0.01324 | -0.00284 | 19.596% |
| F4→Mot→NIH CrystComp | ASD PRS | Medium | -0.00258 | 0.00120 | **0.03139** | -0.00573 | -0.00080 | 8.439% |
| F5→MF→NIH CrystComp | ASD PRS | Medium | -0.00624 | 0.00218 | **0.00422** | -0.01127 | -0.00260 | 7.536% |
| F5→MF→NIH CrystComp | High | -0.01220 | 0.00412 | **0.00304** | -0.02146 | -0.00554 | 3.721% |
| F5→Mot→NIH CrystComp | ASD PRS | Medium | -0.00375 | 0.00172 | **0.02957** | -0.00821 | -0.00112 | 2.227% |
| F1→MF→NIH TotalComp | ASD PRS | Medium | -0.00249 | 0.00110 | **0.02353** | -0.00529 | -0.00087 | 4.043% |
| F4→MF→NIH TotalComp | ASD PRS | Medium | -0.00338 | 0.00132 | **0.01082** | -0.00651 | -0.00127 | 6.082% |
| F4→MF→NIH TotalComp | High | -0.00497 | 0.00233 | **0.03295** | -0.01053 | -0.00142 | 6.326% |
| F4→Mot→NIH TotalComp | ASD PRS | Medium | -0.00279 | 0.00124 | **0.02431** | -0.00599 | -0.00088 | 5.012% |
| F4→FP→NIH TotalComp | ASD PRS | Medium | -0.00234 | 0.00115 | **0.04297** | -0.00528 | -0.00061 | 4.200% |
| F4→Vas→NIH TotalComp | ASD PRS | Medium | -0.00221 | 0.00107 | **0.03866** | -0.00481 | -0.00059 | 3.959% |
| F5→MF→NIH TotalComp | ASD PRS | Medium | -0.00483 | 0.00202 | **0.01696** | -0.00968 | -0.00157 | 2.354% |
| F5→MF→NIH TotalComp | High | -0.00839 | 0.00388 | **0.03063** | -0.01726 | -0.00219 | 4.396% |
| F5→Mot→NIH TotalComp | ASD PRS | Medium | -0.00407 | 0.00177 | **0.02155** | -0.00838 | -0.00137 | 1.979% |
| F5→Vas→NIH TotalComp | ASD PRS | Medium | -0.00365 | 0.00165 | **0.02724** | -0.00798 | -0.00117 | 1.777% |

Abbreviations: ADHD, attention deficit hyperactivity disorder, ASD, autism spectrum disorder, F1: Paternal psychosocial adversity, F4: Caregiver psychopathology, F5: Socioeconomic disadvantages, FP, frontoparietal network, MF, medial frontal network, Mot, motor network, SAL, salience network, Vas, visual association network, PM, proportion mediated, PRS, polygenic risk score.

## Supplementary Table 12. Autoregressive and Cross-domain Paths from Cross-lagged Panel Models Examining Brain Controllability and Cognition.

| **Path Type** | **Outcome** | **Predictor** | **estimate** | **se** | **statistic** | **p.value** | **p.fdr** |
| --- | --- | --- | --- | --- | --- | --- | --- |
| Autoregressive | CBL Follow-up | CBL Baseline | 0.572 | 0.015 | 37.908 | **0.000** | **0.000** |
| DMN Follow-up | DMN Baseline | 0.663 | 0.013 | 52.326 | **0.000** | **0.000** |
| FP Follow-up | FP Baseline | 0.617 | 0.014 | 43.725 | **0.000** | **0.000** |
| MF Follow-up | MF Baseline | 0.531 | 0.015 | 35.597 | **0.000** | **0.000** |
| Mot Follow-up | Mot Baseline | 0.515 | 0.015 | 33.342 | **0.000** | **0.000** |
| SAL Follow-up | SAL Baseline | 0.528 | 0.018 | 29.175 | **0.000** | **0.000** |
| SC Follow-up | SC Baseline | 0.490 | 0.015 | 31.950 | **0.000** | **0.000** |
| Vas Follow-up | Vas Baseline | 0.629 | 0.016 | 40.506 | **0.000** | **0.000** |
| Vis I Follow-up | Vis I Baseline | 0.568 | 0.014 | 39.244 | **0.000** | **0.000** |
| Vis II Follow-up | Vis II Baseline | 0.597 | 0.014 | 42.880 | **0.000** | **0.000** |
| NIH CrystComp Follow-up | NIH CrystComp Baseline | 0.665 | 0.015 | 43.284 | **0.000** | **0.000** |
| Cross-domain | CBL Follow-up | NIH CrystComp Baseline | -0.013 | 0.013 | -0.994 | 0.320 | 0.346 |
| DMN Follow-up | NIH CrystComp Baseline | -0.011 | 0.011 | -0.956 | 0.339 | 0.357 |
| FP Follow-up | NIH CrystComp Baseline | -0.015 | 0.012 | -1.272 | 0.204 | 0.263 |
| MF Follow-up | NIH CrystComp Baseline | -0.033 | 0.013 | -2.544 | 0.011 | **0.020** |
| Mot Follow-up | NIH CrystComp Baseline | -0.018 | 0.013 | -1.334 | 0.182 | 0.243 |
| SAL Follow-up | NIH CrystComp Baseline | -0.024 | 0.013 | -1.823 | 0.068 | 0.098 |
| SC Follow-up | NIH CrystComp Baseline | -0.015 | 0.013 | -1.159 | 0.246 | 0.299 |
| Vas Follow-up | NIH CrystComp Baseline | 0.018 | 0.012 | 1.578 | 0.114 | 0.158 |
| Vis I Follow-up | NIH CrystComp Baseline | 0.014 | 0.013 | 1.076 | 0.282 | 0.332 |
| Vis II Follow-up | NIH CrystComp Baseline | -0.005 | 0.012 | -0.383 | 0.702 | 0.719 |
| NIH CrystComp Follow-up | CBL Baseline | 0.012 | 0.012 | 0.997 | 0.319 | 0.346 |
| NIH CrystComp Follow-up | DMN Baseline | -0.024 | 0.012 | -2.056 | 0.040 | 0.061 |
| NIH CrystComp Follow-up | FP Baseline | -0.027 | 0.012 | -2.327 | 0.020 | **0.033** |
| NIH CrystComp Follow-up | MF Baseline | -0.037 | 0.012 | -3.130 | 0.002 | **0.003** |
| NIH CrystComp Follow-up | Mot Baseline | -0.029 | 0.012 | -2.390 | 0.017 | **0.029** |
| NIH CrystComp Follow-up | SAL Baseline | -0.012 | 0.011 | -1.054 | 0.292 | 0.334 |
| NIH CrystComp Follow-up | SC Baseline | -0.024 | 0.012 | -2.015 | 0.044 | 0.065 |
| NIH CrystComp Follow-up | Vas Baseline | -0.026 | 0.011 | -2.240 | 0.025 | **0.040** |
| NIH CrystComp Follow-up | Vis I Baseline | 0.001 | 0.012 | 0.077 | 0.939 | 0.939 |
| NIH CrystComp Follow-up | Vis II Baseline | -0.014 | 0.012 | -1.188 | 0.235 | 0.293 |

Abbreviations: CBL, cerebellar network, DMN, default mode network, FP, frontoparietal network, MF, medial frontal network, Mot, motor network, SAL, salience network, SC, subcortical network, Vas, visual association network, Vis I, visual network I, Vis II, visual network II.

## Supplementary Table 13. Autoregressive and Cross-domain Paths from Cross-lagged Panel Models Examining Brain Controllability and Behavior.

| **Path Type** | **Outcome** | **Predictor** | **estimate** | **se** | **statistic** | **p.value** | **p.fdr** |
| --- | --- | --- | --- | --- | --- | --- | --- |
| Autoregressive | CBL_Follow-up | CBL Baseline | 0.576 | 0.013 | 44.142 | **0.000** | **0.000** |
| DMN_Follow-up | DMN Baseline | 0.665 | 0.011 | 59.576 | **0.000** | **0.000** |
| FP_Follow-up | FP Baseline | 0.612 | 0.013 | 48.910 | **0.000** | **0.000** |
| MF_Follow-up | MF Baseline | 0.532 | 0.013 | 40.059 | **0.000** | **0.000** |
| Mot_Follow-up | Mot Baseline | 0.509 | 0.014 | 36.645 | **0.000** | **0.000** |
| SAL_Follow-up | SAL Baseline | 0.524 | 0.015 | 34.087 | **0.000** | **0.000** |
| SC_Follow-up | SC Baseline | 0.488 | 0.014 | 35.046 | **0.000** | **0.000** |
| Vas_Follow-up | Vas Baseline | 0.626 | 0.013 | 47.615 | **0.000** | **0.000** |
| Vis I_Follow-up | Vis I Baseline | 0.564 | 0.013 | 43.865 | **0.000** | **0.000** |
| Vis II_Follow-up | Vis II Baseline | 0.601 | 0.012 | 49.161 | **0.000** | **0.000** |
| CBCL External Follow-up | CBCL External Baseline | 0.677 | 0.011 | 63.291 | **0.000** | **0.000** |
| CBCL Internal Follow-up | CBCL Internal Baseline | 0.629 | 0.011 | 57.774 | **0.000** | **0.000** |
| CBCL TotalProb Follow-up | CBCL TotalProb Baseline | 0.703 | 0.010 | 67.553 | **0.000** | **0.000** |
| Cross-domain | CBL_Follow-up | CBCL External Baseline | 0.014 | 0.012 | 1.238 | 0.216 | 0.320 |
| CBL_Follow-up | CBCL Internal Baseline | 0.002 | 0.012 | 0.177 | 0.859 | 0.913 |
| CBL_Follow-up | CBCL TotalProb Baseline | 0.013 | 0.012 | 1.109 | 0.268 | 0.373 |
| DMN_Follow-up | CBCL External Baseline | 0.011 | 0.011 | 1.017 | 0.309 | 0.422 |
| DMN_Follow-up | CBCL Internal Baseline | 0.015 | 0.010 | 1.457 | 0.145 | 0.235 |
| DMN_Follow-up | CBCL TotalProb Baseline | 0.018 | 0.011 | 1.709 | 0.087 | 0.154 |
| FP_Follow-up | CBCL External Baseline | 0.011 | 0.011 | 0.968 | 0.333 | 0.444 |
| FP_Follow-up | CBCL Internal Baseline | 0.010 | 0.011 | 0.884 | 0.377 | 0.497 |
| FP_Follow-up | CBCL TotalProb Baseline | 0.011 | 0.011 | 1.009 | 0.313 | 0.422 |
| MF_Follow-up | CBCL External Baseline | 0.025 | 0.012 | 2.082 | 0.037 | 0.068 |
| MF_Follow-up | CBCL Internal Baseline | 0.020 | 0.012 | 1.693 | 0.090 | 0.157 |
| MF_Follow-up | CBCL TotalProb Baseline | 0.025 | 0.012 | 2.108 | 0.035 | 0.065 |
| Mot_Follow-up | CBCL External Baseline | 0.023 | 0.012 | 1.915 | 0.056 | 0.100 |
| Mot_Follow-up | CBCL Internal Baseline | 0.027 | 0.012 | 2.216 | 0.027 | 0.050 |
| Mot_Follow-up | CBCL TotalProb Baseline | 0.028 | 0.012 | 2.296 | 0.022 | **0.041** |
| SAL_Follow-up | CBCL External Baseline | 0.009 | 0.012 | 0.753 | 0.452 | 0.573 |
| SAL_Follow-up | CBCL Internal Baseline | 0.013 | 0.012 | 1.054 | 0.292 | 0.402 |
| SAL_Follow-up | CBCL TotalProb Baseline | 0.015 | 0.012 | 1.256 | 0.209 | 0.314 |
| SC_Follow-up | CBCL External Baseline | 0.002 | 0.012 | 0.134 | 0.894 | 0.924 |
| SC_Follow-up | CBCL Internal Baseline | 0.003 | 0.012 | 0.205 | 0.838 | 0.905 |
| SC_Follow-up | CBCL TotalProb Baseline | 0.002 | 0.012 | 0.149 | 0.881 | 0.920 |
| Vas_Follow-up | CBCL External Baseline | 0.009 | 0.011 | 0.841 | 0.400 | 0.522 |
| Vas_Follow-up | CBCL Internal Baseline | 0.003 | 0.011 | 0.305 | 0.761 | 0.853 |
| Vas_Follow-up | CBCL TotalProb Baseline | 0.007 | 0.011 | 0.657 | 0.511 | 0.626 |
| Vis I_Follow-up | CBCL External Baseline | -0.003 | 0.012 | -0.215 | 0.830 | 0.905 |
| Vis I_Follow-up | CBCL Internal Baseline | -0.015 | 0.012 | -1.285 | 0.199 | 0.310 |
| Vis I_Follow-up | CBCL TotalProb Baseline | -0.007 | 0.012 | -0.617 | 0.537 | 0.638 |
| Vis II_Follow-up | CBCL External Baseline | -0.002 | 0.011 | -0.179 | 0.858 | 0.913 |
| Vis II_Follow-up | CBCL Internal Baseline | -0.007 | 0.011 | -0.640 | 0.522 | 0.633 |
| Vis II_Follow-up | CBCL TotalProb Baseline | -0.005 | 0.011 | -0.470 | 0.638 | 0.744 |
| CBCL External Follow-up | CBL Baseline | 0.024 | 0.010 | 2.370 | 0.018 | **0.034** |
| CBCL External Follow-up | DMN Baseline | 0.000 | 0.010 | -0.036 | 0.971 | 0.971 |
| CBCL External Follow-up | FP Baseline | 0.002 | 0.010 | 0.218 | 0.827 | 0.905 |
| CBCL External Follow-up | MF Baseline | 0.008 | 0.010 | 0.799 | 0.424 | 0.547 |
| CBCL External Follow-up | Mot Baseline | 0.007 | 0.010 | 0.717 | 0.473 | 0.592 |
| CBCL External Follow-up | SAL Baseline | 0.011 | 0.010 | 1.119 | 0.263 | 0.372 |
| CBCL External Follow-up | SC Baseline | 0.017 | 0.010 | 1.619 | 0.106 | 0.176 |
| CBCL External Follow-up | Vas Baseline | 0.015 | 0.010 | 1.516 | 0.130 | 0.213 |
| CBCL External Follow-up | Vis I Baseline | -0.007 | 0.010 | -0.676 | 0.499 | 0.617 |
| CBCL External Follow-up | Vis II Baseline | 0.012 | 0.010 | 1.150 | 0.250 | 0.361 |
| CBCL Internal Follow-up | CBL Baseline | 0.014 | 0.011 | 1.260 | 0.208 | 0.314 |
| CBCL Internal Follow-up | DMN Baseline | -0.005 | 0.011 | -0.415 | 0.678 | 0.768 |
| CBCL Internal Follow-up | FP Baseline | -0.004 | 0.011 | -0.417 | 0.676 | 0.768 |
| CBCL Internal Follow-up | MF Baseline | 0.001 | 0.011 | 0.059 | 0.953 | 0.965 |
| CBCL Internal Follow-up | Mot Baseline | -0.002 | 0.011 | -0.158 | 0.875 | 0.920 |
| CBCL Internal Follow-up | SAL Baseline | 0.001 | 0.011 | 0.054 | 0.957 | 0.965 |
| CBCL Internal Follow-up | SC Baseline | -0.014 | 0.011 | -1.269 | 0.205 | 0.314 |
| CBCL Internal Follow-up | Vas Baseline | 0.005 | 0.011 | 0.482 | 0.630 | 0.741 |
| CBCL Internal Follow-up | Vis I Baseline | -0.033 | 0.011 | -2.990 | 0.003 | **0.005** |
| CBCL Internal Follow-up | Vis II Baseline | 0.003 | 0.011 | 0.258 | 0.796 | 0.885 |
| CBCL TotalProb Follow-up | CBL Baseline | 0.016 | 0.010 | 1.651 | 0.099 | 0.167 |
| CBCL TotalProb Follow-up | DMN Baseline | 0.004 | 0.010 | 0.438 | 0.662 | 0.764 |
| CBCL TotalProb Follow-up | FP Baseline | 0.001 | 0.010 | 0.123 | 0.902 | 0.925 |
| CBCL TotalProb Follow-up | MF Baseline | 0.012 | 0.010 | 1.177 | 0.239 | 0.350 |
| CBCL TotalProb Follow-up | Mot Baseline | 0.013 | 0.010 | 1.318 | 0.188 | 0.296 |
| CBCL TotalProb Follow-up | SAL Baseline | 0.011 | 0.010 | 1.141 | 0.254 | 0.363 |
| CBCL TotalProb Follow-up | SC Baseline | 0.006 | 0.010 | 0.629 | 0.529 | 0.635 |
| CBCL TotalProb Follow-up | Vas Baseline | 0.014 | 0.010 | 1.435 | 0.151 | 0.242 |
| CBCL TotalProb Follow-up | Vis I Baseline | -0.016 | 0.010 | -1.650 | 0.099 | 0.167 |
| CBCL TotalProb Follow-up | Vis II Baseline | 0.008 | 0.010 | 0.749 | 0.454 | 0.573 |

Abbreviations: CBL, cerebellar network, DMN, default mode network, FP, frontoparietal network, MF, medial frontal network, Mot, motor network, SAL, salience network, SC, subcortical network, Vas, visual association network, Vis I, visual network I, Vis II, visual network II.

# Supplementary Figures

**
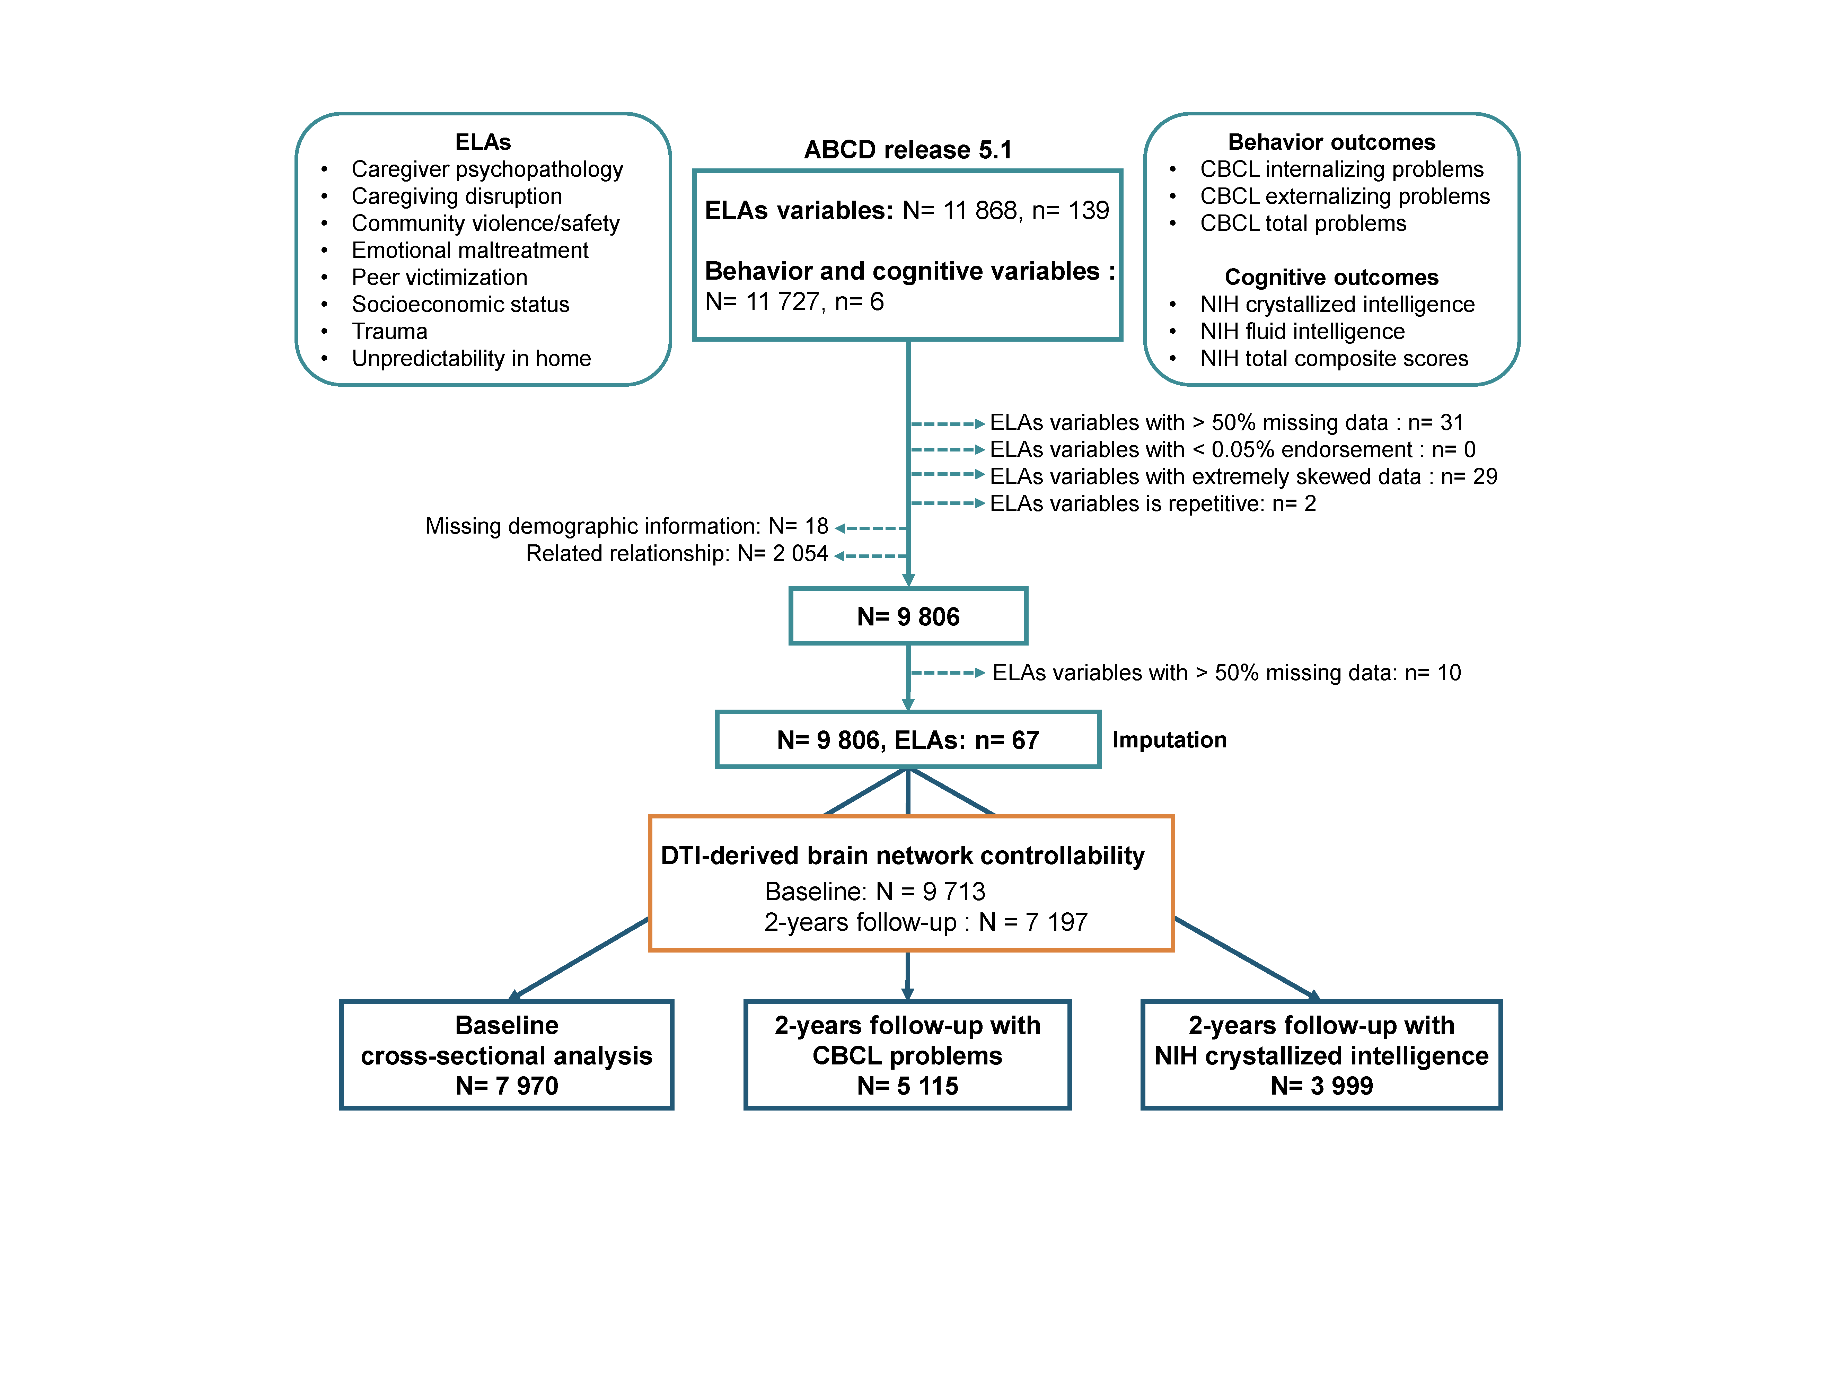
**

## Supplementary Figure 1. Data Processing Workflow for ELAs, Behavioral Outcomes and DTI-derived Controllability.

This diagram illustrates the data processing steps for early life adversity (ELA) variables, behavioral and cognitive outcomes, and diffusion tensor imaging (DTI)-derived brain network controllability measures based on the Adolescent Brain Cognitive Development (ABCD) Study release 5.1.


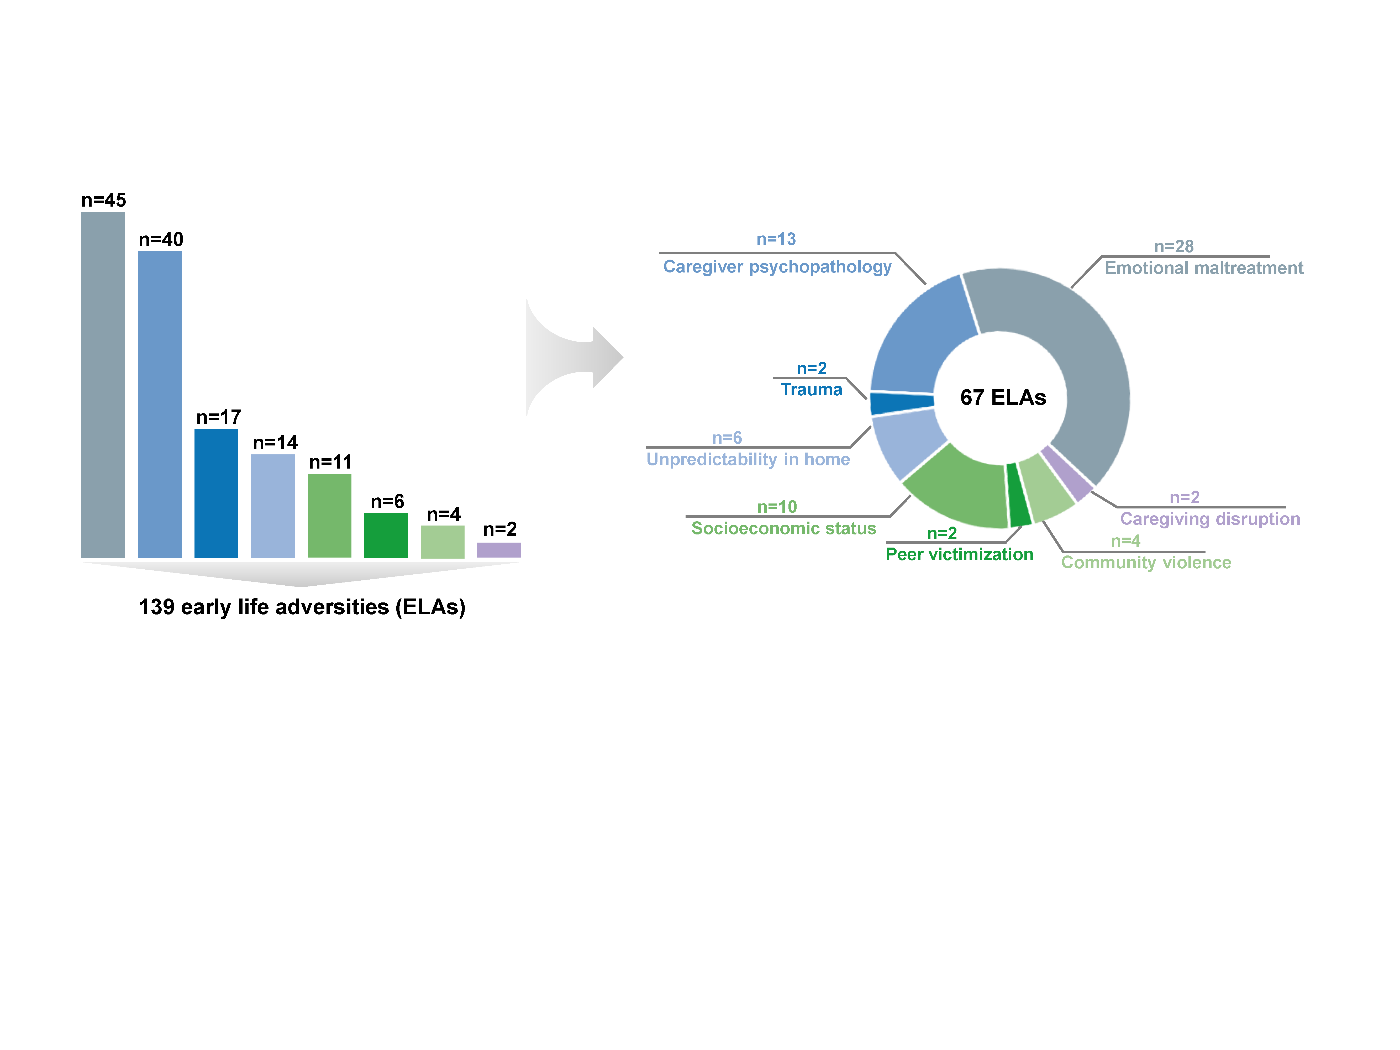


## Supplementary Figure 2. Early Life Adversities Variables Included in the Analysis.

The left panel illustrates the total number of early life adversity (ELA) variables (n= 139) categorized across major adversity domains. The right panel shows the final subset of 67 ELA variables retained for analysis following quality control procedures. The donut chart depicts the distribution of these 67 variables across eight domains: emotional maltreatment (n = 28), caregiver psychopathology (n = 13), trauma (n = 2), unpredictability in home (n = 6), socioeconomic status (n = 10), peer victimization (n = 2), community violence (n = 4), and caregiving disruption (n = 2). Color coding indicates domain categories consistent across figures.


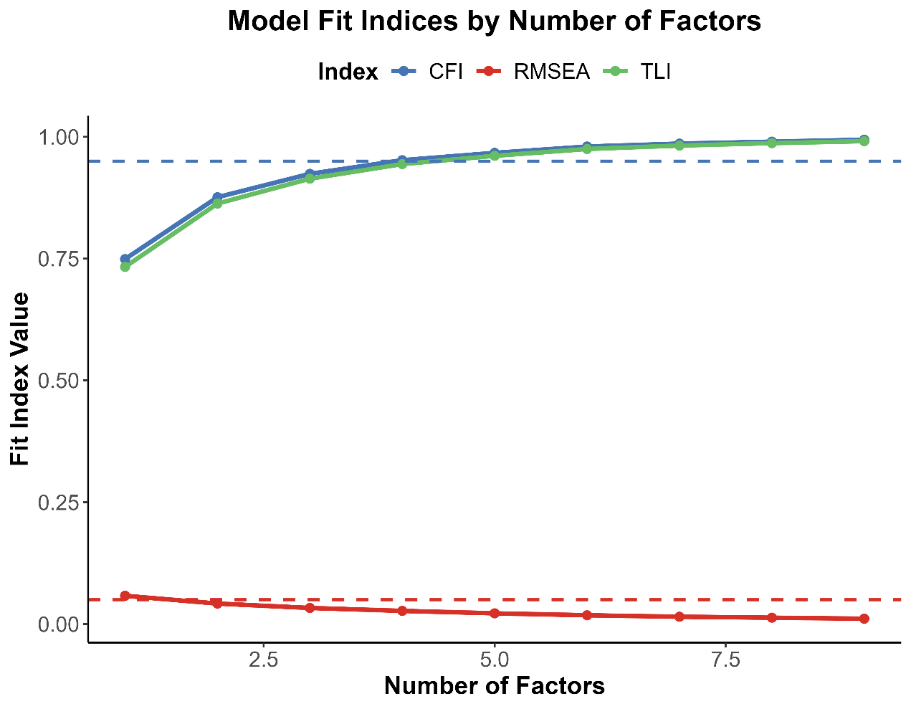


## Supplementary Figure 3. Model Fit Indices across Exploratory Factor Analysis Models with 1-9 Factors.

Model fit indices, including the comparative fit index (CFI), Tucker-Lewis index (TLI), and root mean square error of approximation (RMSEA), are plotted against the number of factors extracted in exploratory factor analysis (EFA). Dashed lines indicate conventional fit thresholds (CFI/TLI ≥ 0.95; RMSEA ≤ 0.05). Model fit improved with additional factors but showed minimal gain beyond 5 factors, supporting the selection of a 5-factor solution.


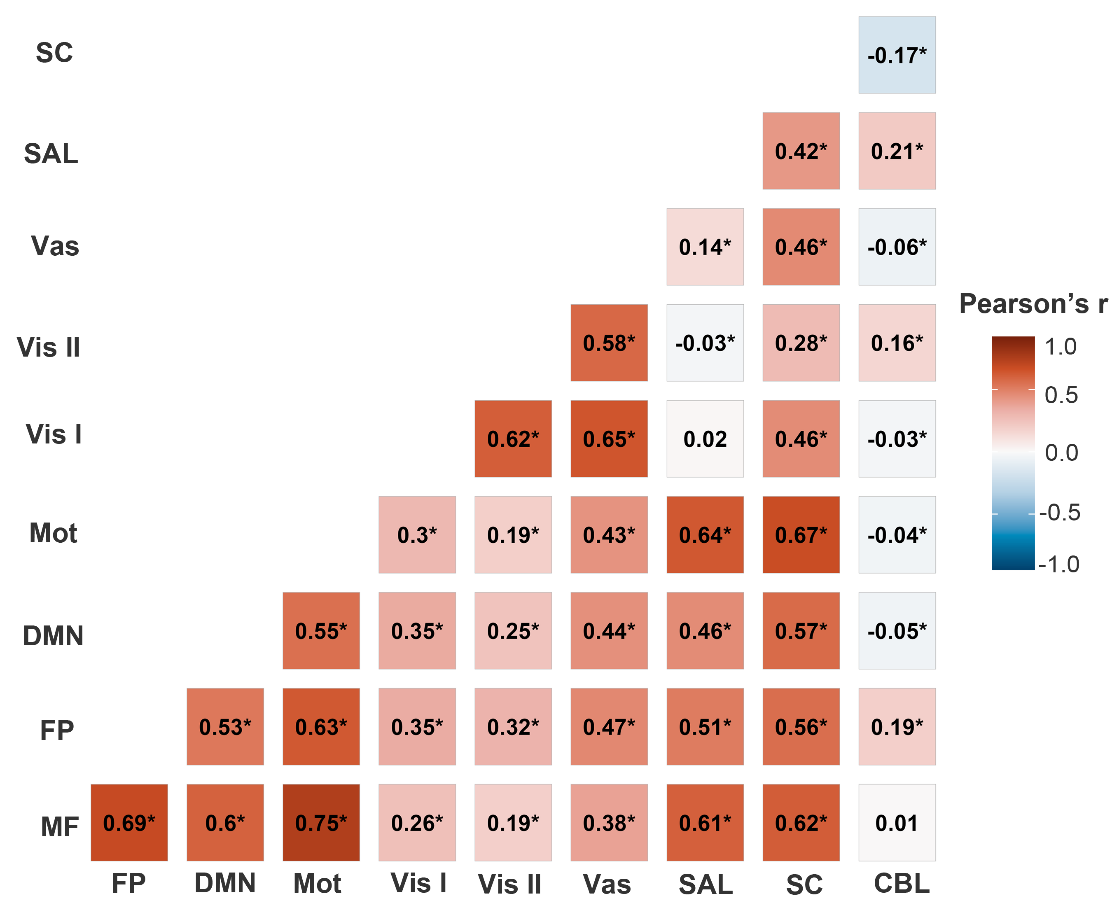


## Supplementary Figure 4. Pearson Correlations between Brain Controllability Metrics.

This figure presents pairwise Pearson correlation coefficients (*r*) between network-level brain controllability. Stars denote statistically significant correlations after FDR correction (*q*< .05).


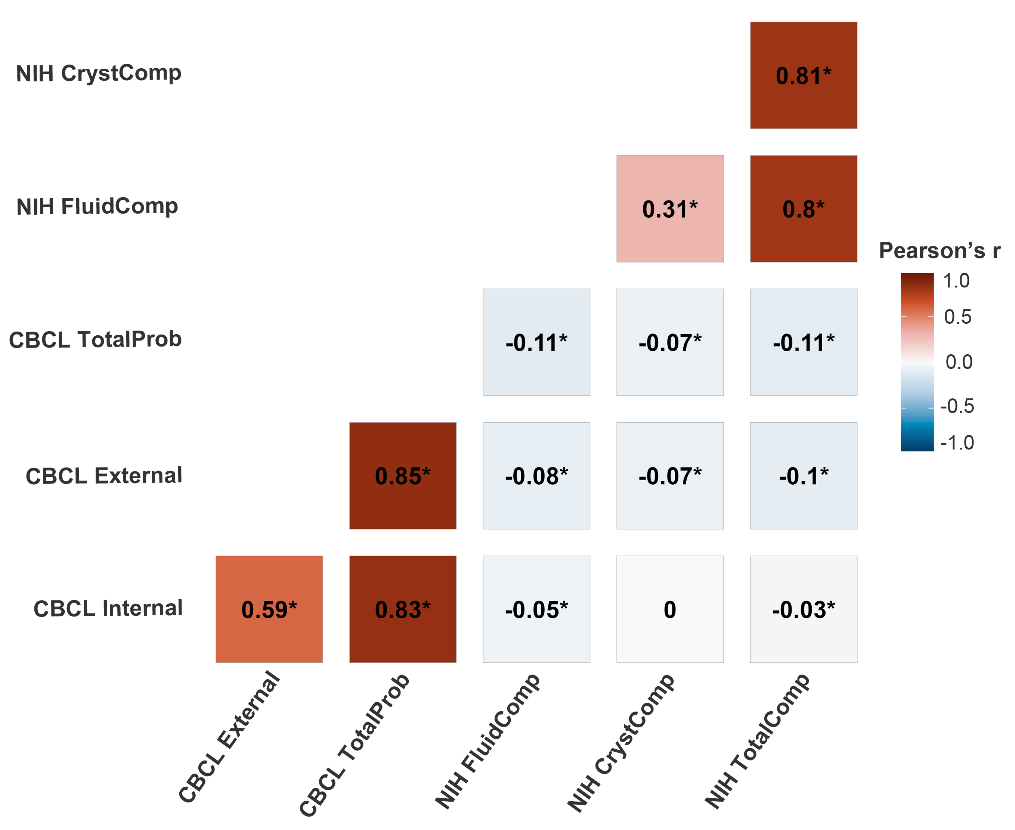


## Supplementary Figure 5. Pearson Correlations between Behavioral outcomes.

This figure presents pairwise Pearson correlation coefficients (*r*) between behavioral outcomes. Stars denote statistically significant correlations after FDR correction (*q*< .05).


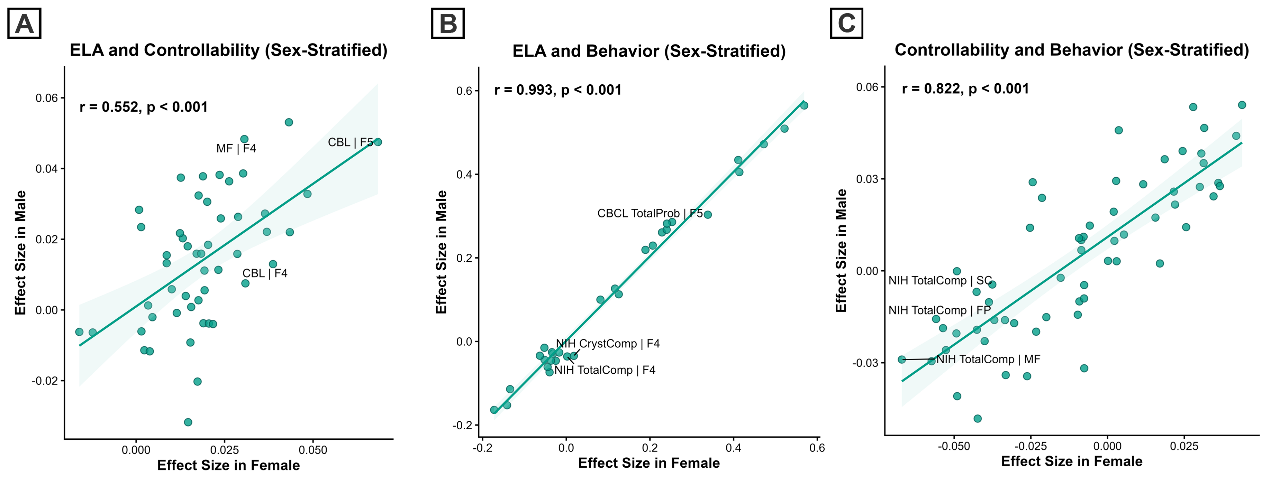


## Supplementary Figure 6. Correlation of Effect Sizes Across Sex Groups for ELA Factors, Brain Network Controllability and Behavior Associations.

Scatterplots show correlations between effect sizes in males vs females for (A) ELA and brain network controllability associations, (B) ELA and behavioral outcome associations, and (C) brain network controllability and behavioral outcome associations. Effect sizes were calculated from sex-stratified models. All three panels demonstrate moderate to strong correlation across sex groups, supporting consistency. The three most deviant points from the identity line were labeled to highlight potential sex-specific effects.


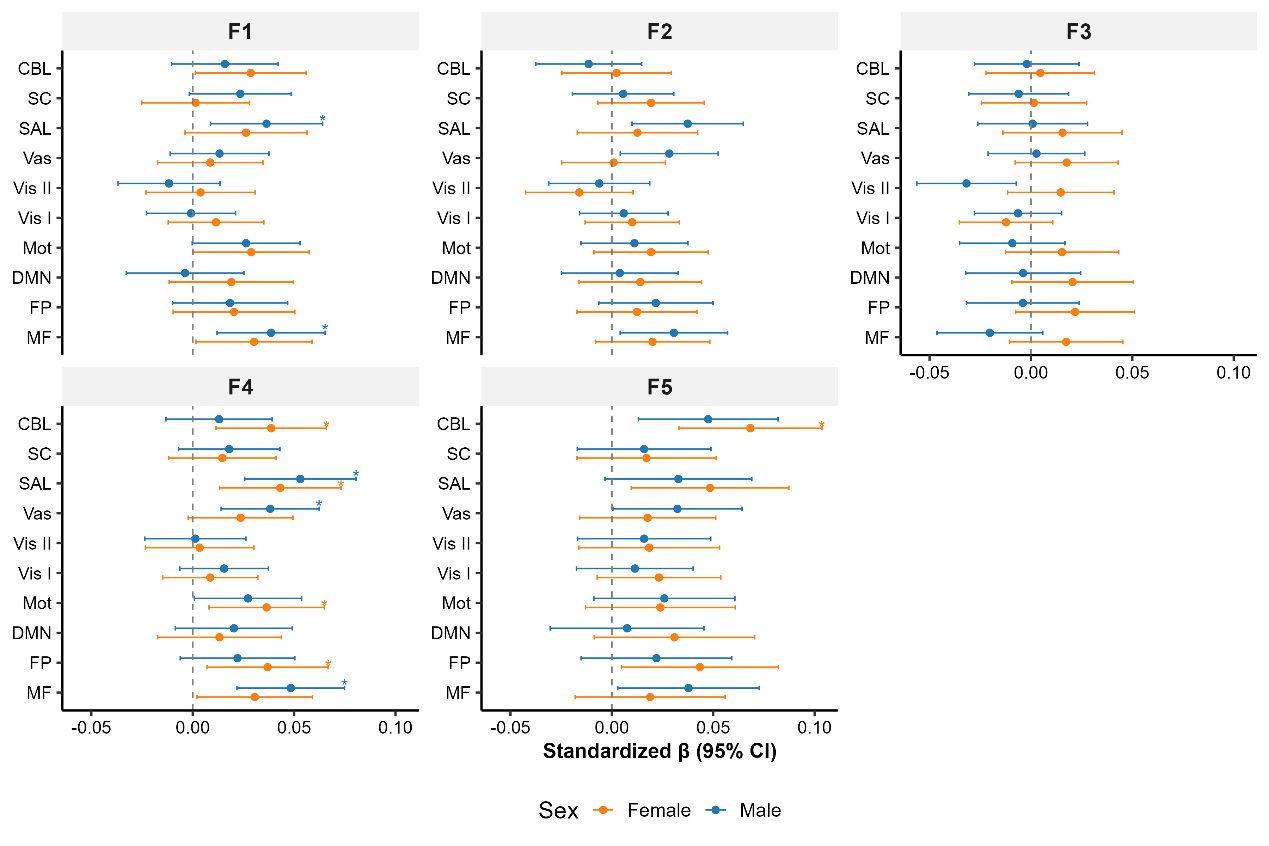


## Supplementary Figure 7. Sex-stratified Associations between ELA Factors and Brain Network Controllability.

Standardized *β* coefficients (dots) and 95% confidence intervals (horizontal lines) are shown for the associations between each ELA factor (F1–F5) and brain network controllability across 10 brain networks, stratified by sex (Female: orange; Male: blue). Asterisks indicate associations that remained statistically significant after FDR correction (*q* < .05). Abbreviations: CBL, cerebellar network, DMN, default mode network, FP, frontoparietal network, MF, medial frontal network, Mot, motor network, SAL, salience network, SC, subcortical network, Vas, visual association network, Vis I, visual network I, Vis II, visual network II.


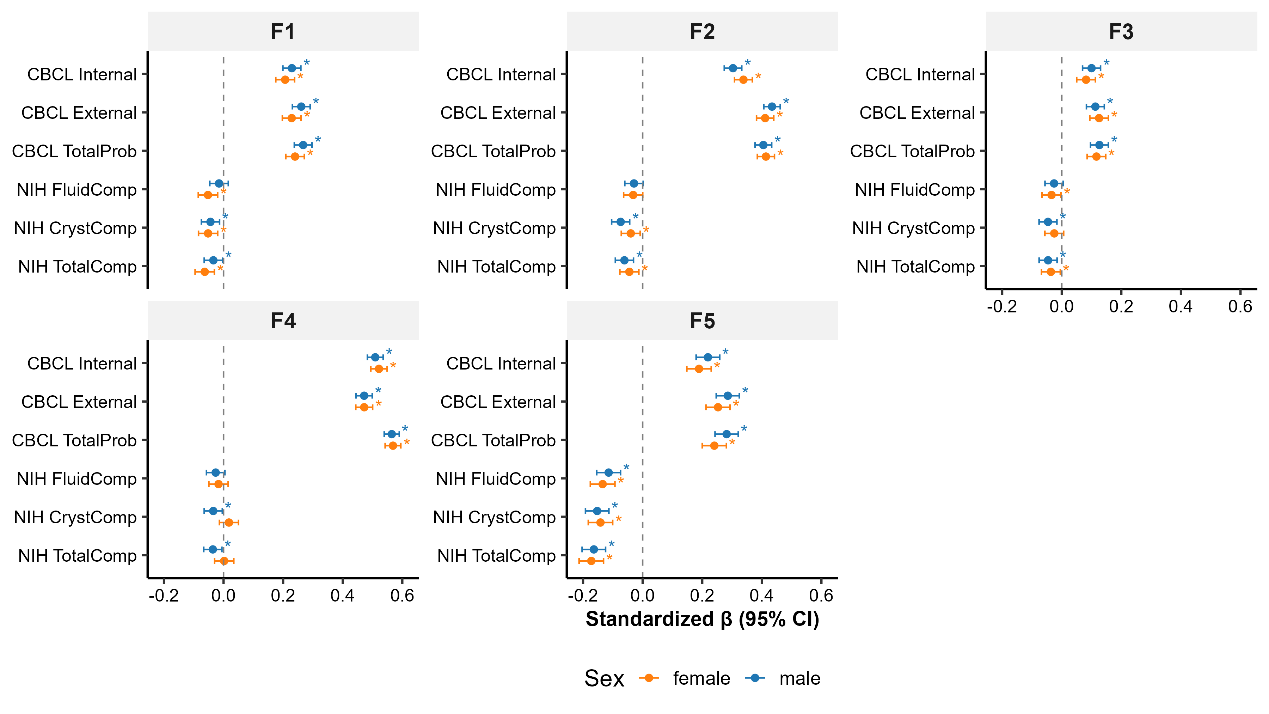


## Supplementary Figure 8. Sex-stratified Associations between ELA Factors and Behavioral Outcomes.

Standardized *β* coefficients (dots) and 95% confidence intervals (horizontal lines) are shown for the associations between each ELA factor (F1–F5) and behavioral measure, stratified by sex (Female: orange; Male: blue). Asterisks indicate associations that remained statistically significant after FDR correction (*q* < .05).


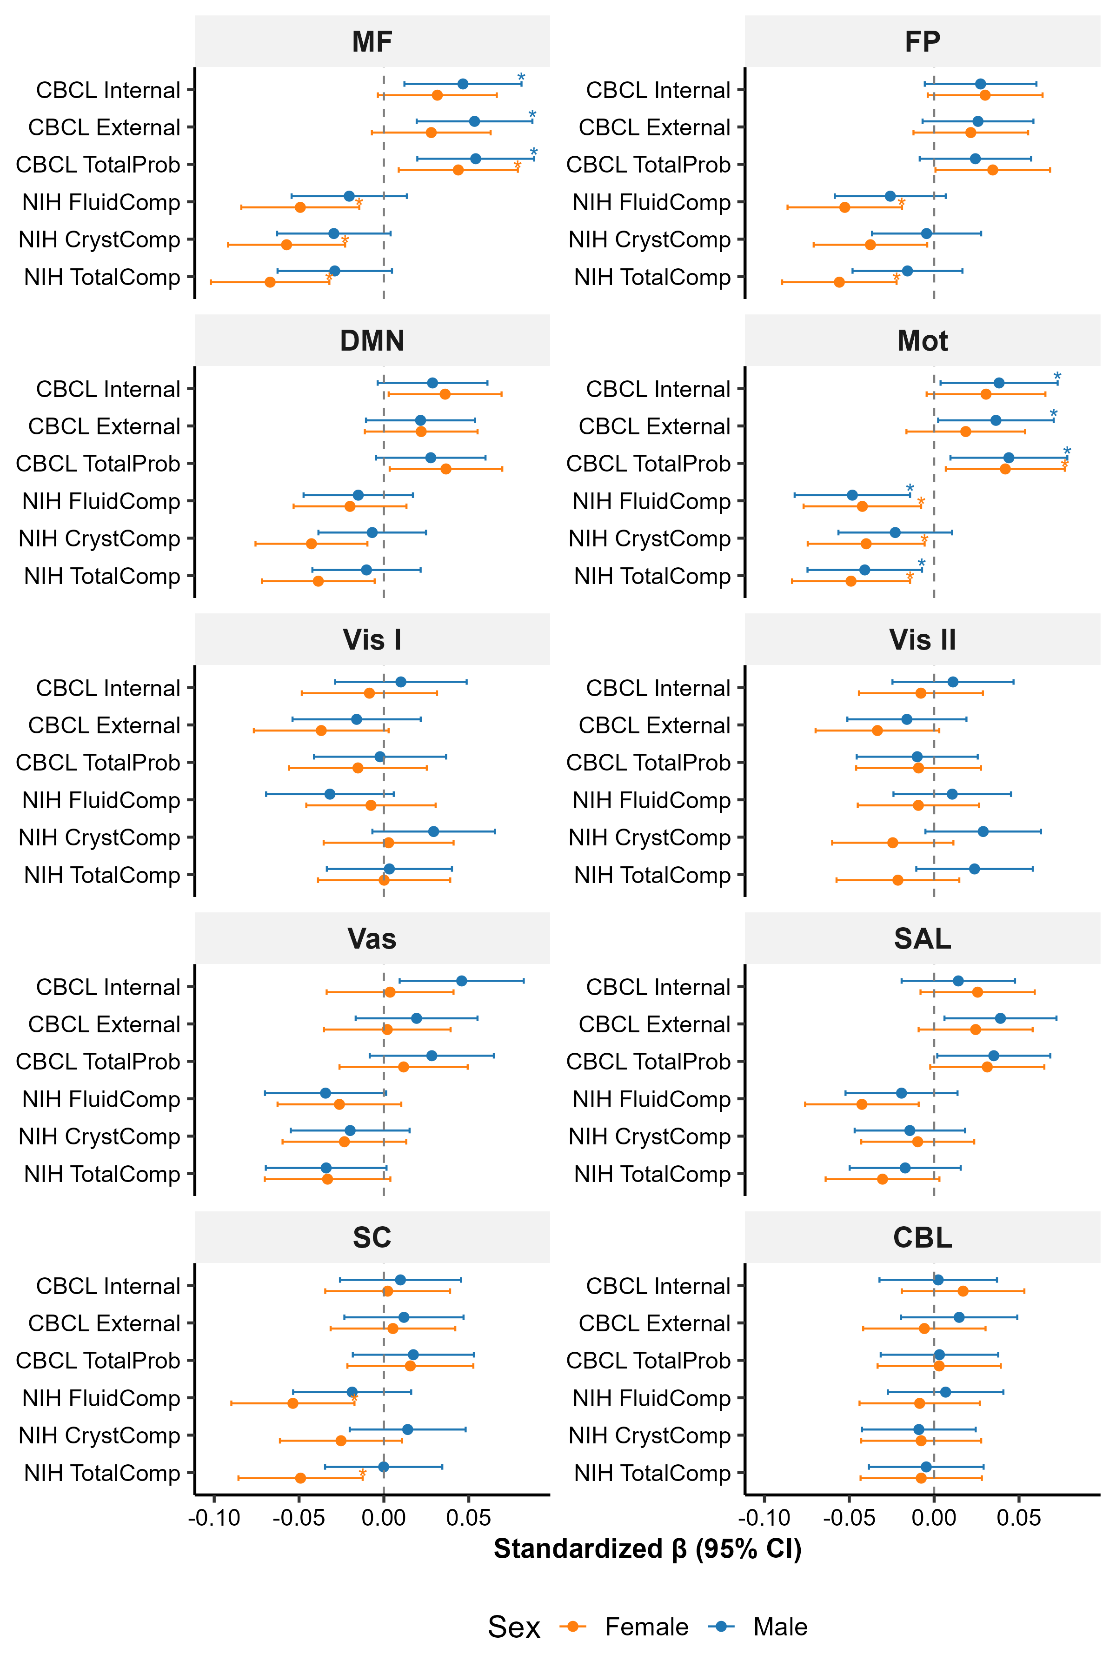


## Supplementary Figure 9. Sex-stratified Associations between Brain Network Controllability and Behavioral Outcomes.

Standardized *β* coefficients (dots) and 95% confidence intervals (horizontal lines) are shown for the associations between each brain network controllability and behavioral measure, stratified by sex (Female: orange; Male: blue). Asterisks indicate associations that remained statistically significant after FDR correction (*q* < .05). Abbreviations: CBL, cerebellar network, DMN, default mode network, FP, frontoparietal network, MF, medial frontal network, Mot, motor network, SAL, salience network, SC, subcortical network, Vas, visual association network, Vis I, visual network I, Vis II, visual network II.


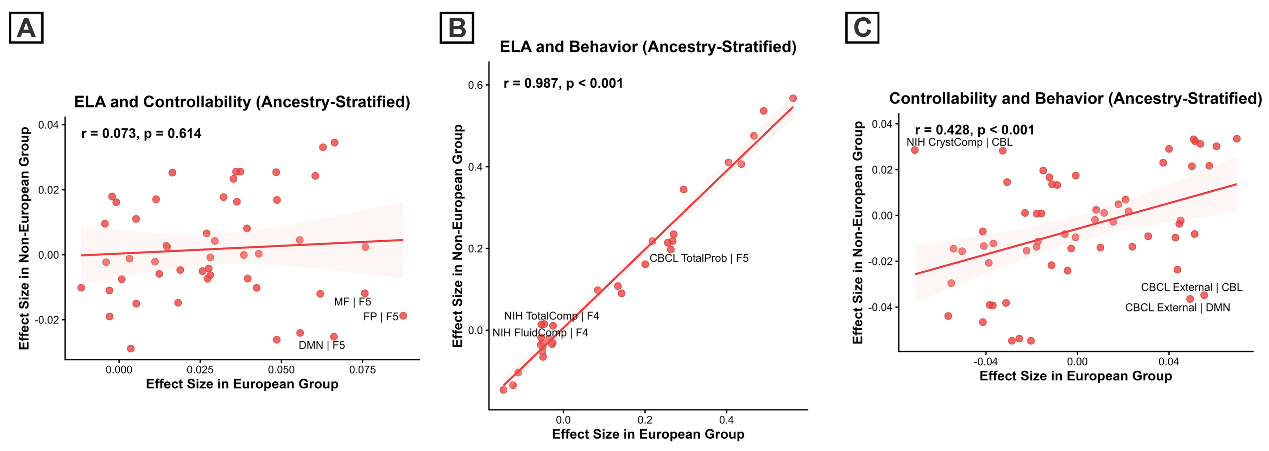


## Supplementary Figure 10. Correlation of Effect Sizes Across Ancestry Groups for ELA Factors, Brain Network Controllability and Behavior Associations.

Scatterplots show correlations between effect sizes in European vs non-European ancestry groups. (A) ELA and brain network controllability associations showed poor consistency, suggesting ancestry-specific effects. (B) ELA and behavioral outcome associations, and (C) brain network controllability and behavioral outcome associations remained moderately to highly correlated across groups. Effect sizes were calculated from sex-stratified models. The three most deviant points from the identity line were labeled to highlight potential ancestry-specific effects.


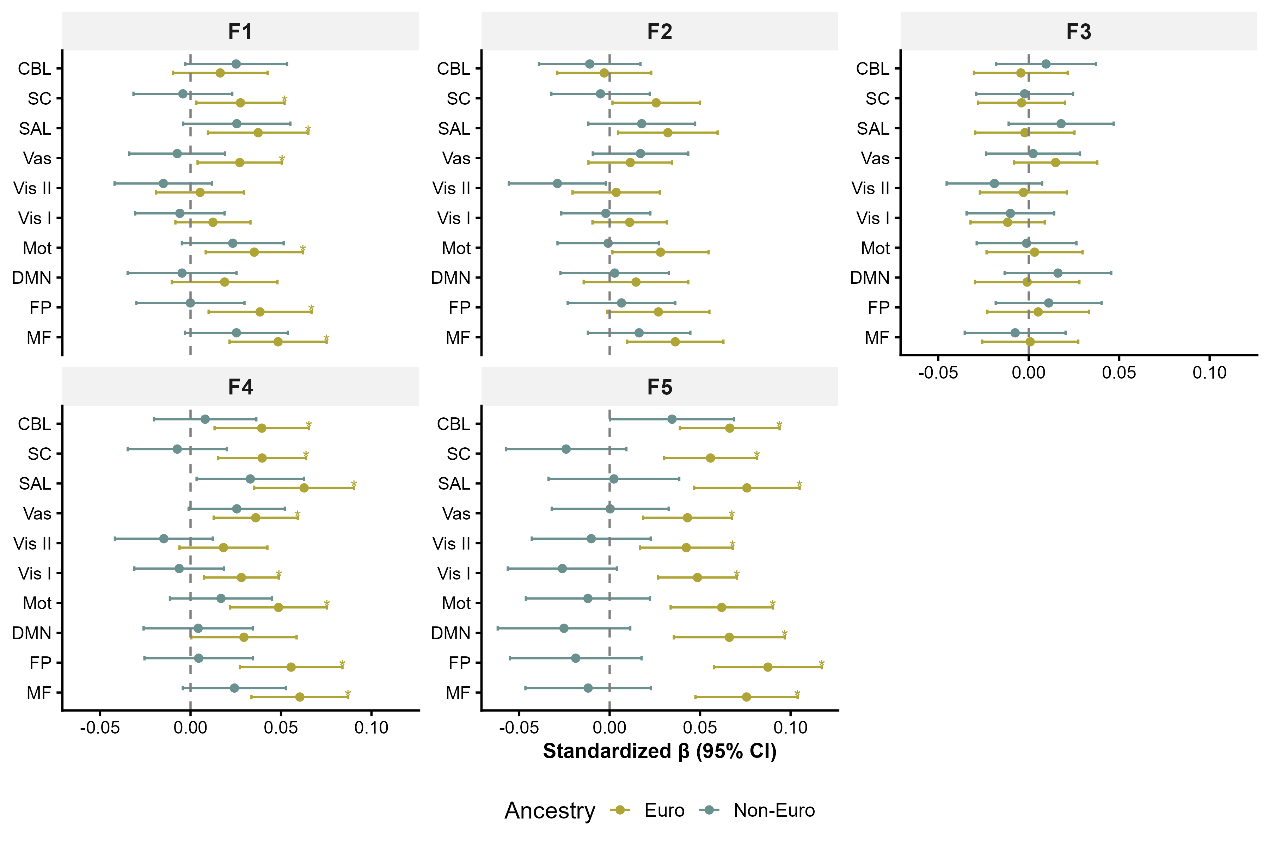


## Supplementary Figure 11. Ancestry-stratified Associations between ELA Factors and Brain Network Controllability.

Standardized *β* coefficients (dots) and 95% confidence intervals (horizontal lines) are shown for the associations between each ELA factor (F1–F5) and brain network controllability across 10 brain networks, stratified by race (European ancestry: yellow; non-European ancestry: teal). Asterisks indicate associations that remained statistically significant after FDR correction (*q* < .05). Abbreviations: CBL, cerebellar network, DMN, default mode network, FP, frontoparietal network, MF, medial frontal network, Mot, motor network, SAL, salience network, SC, subcortical network, Vas, visual association network, Vis I, visual network I, Vis II, visual network II.


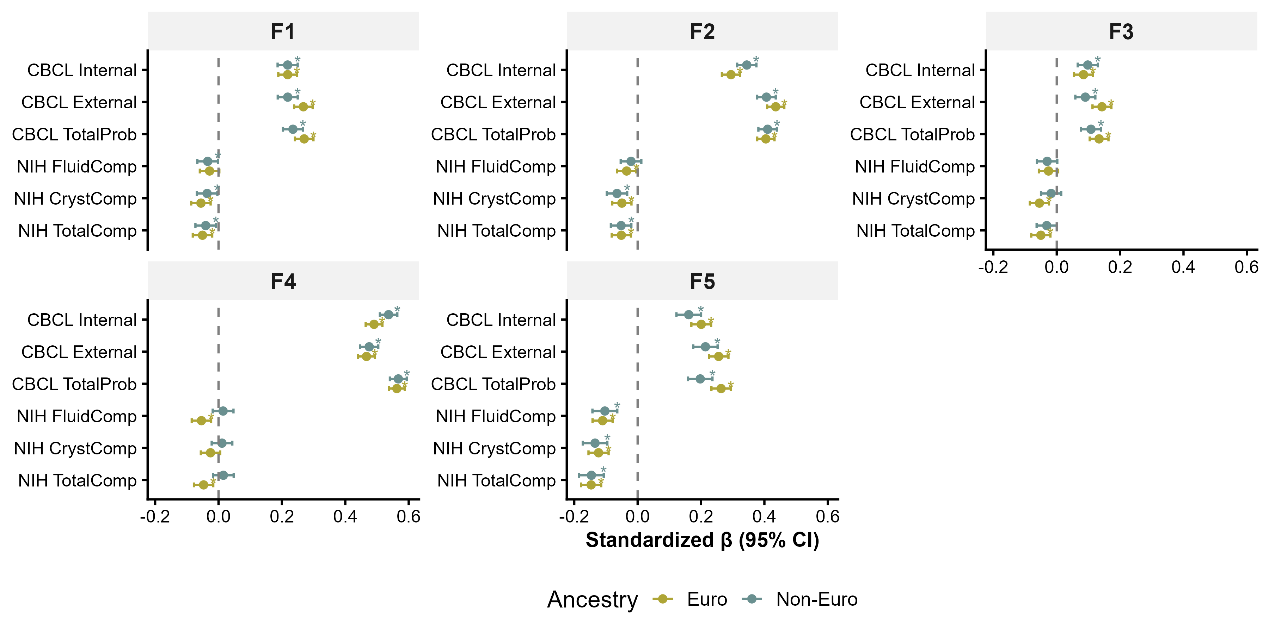


## Supplementary Figure 12. Ancestry-stratified Associations between ELA Factors and Behavioral Outcomes.

Standardized *β* coefficients (dots) and 95% confidence intervals (horizontal lines) are shown for the associations between each ELA factor (F1–F5) and behavioral measure, stratified by race (European ancestry: yellow; non-European ancestry: teal). Asterisks indicate associations that remained statistically significant after FDR correction (*q* < .05).


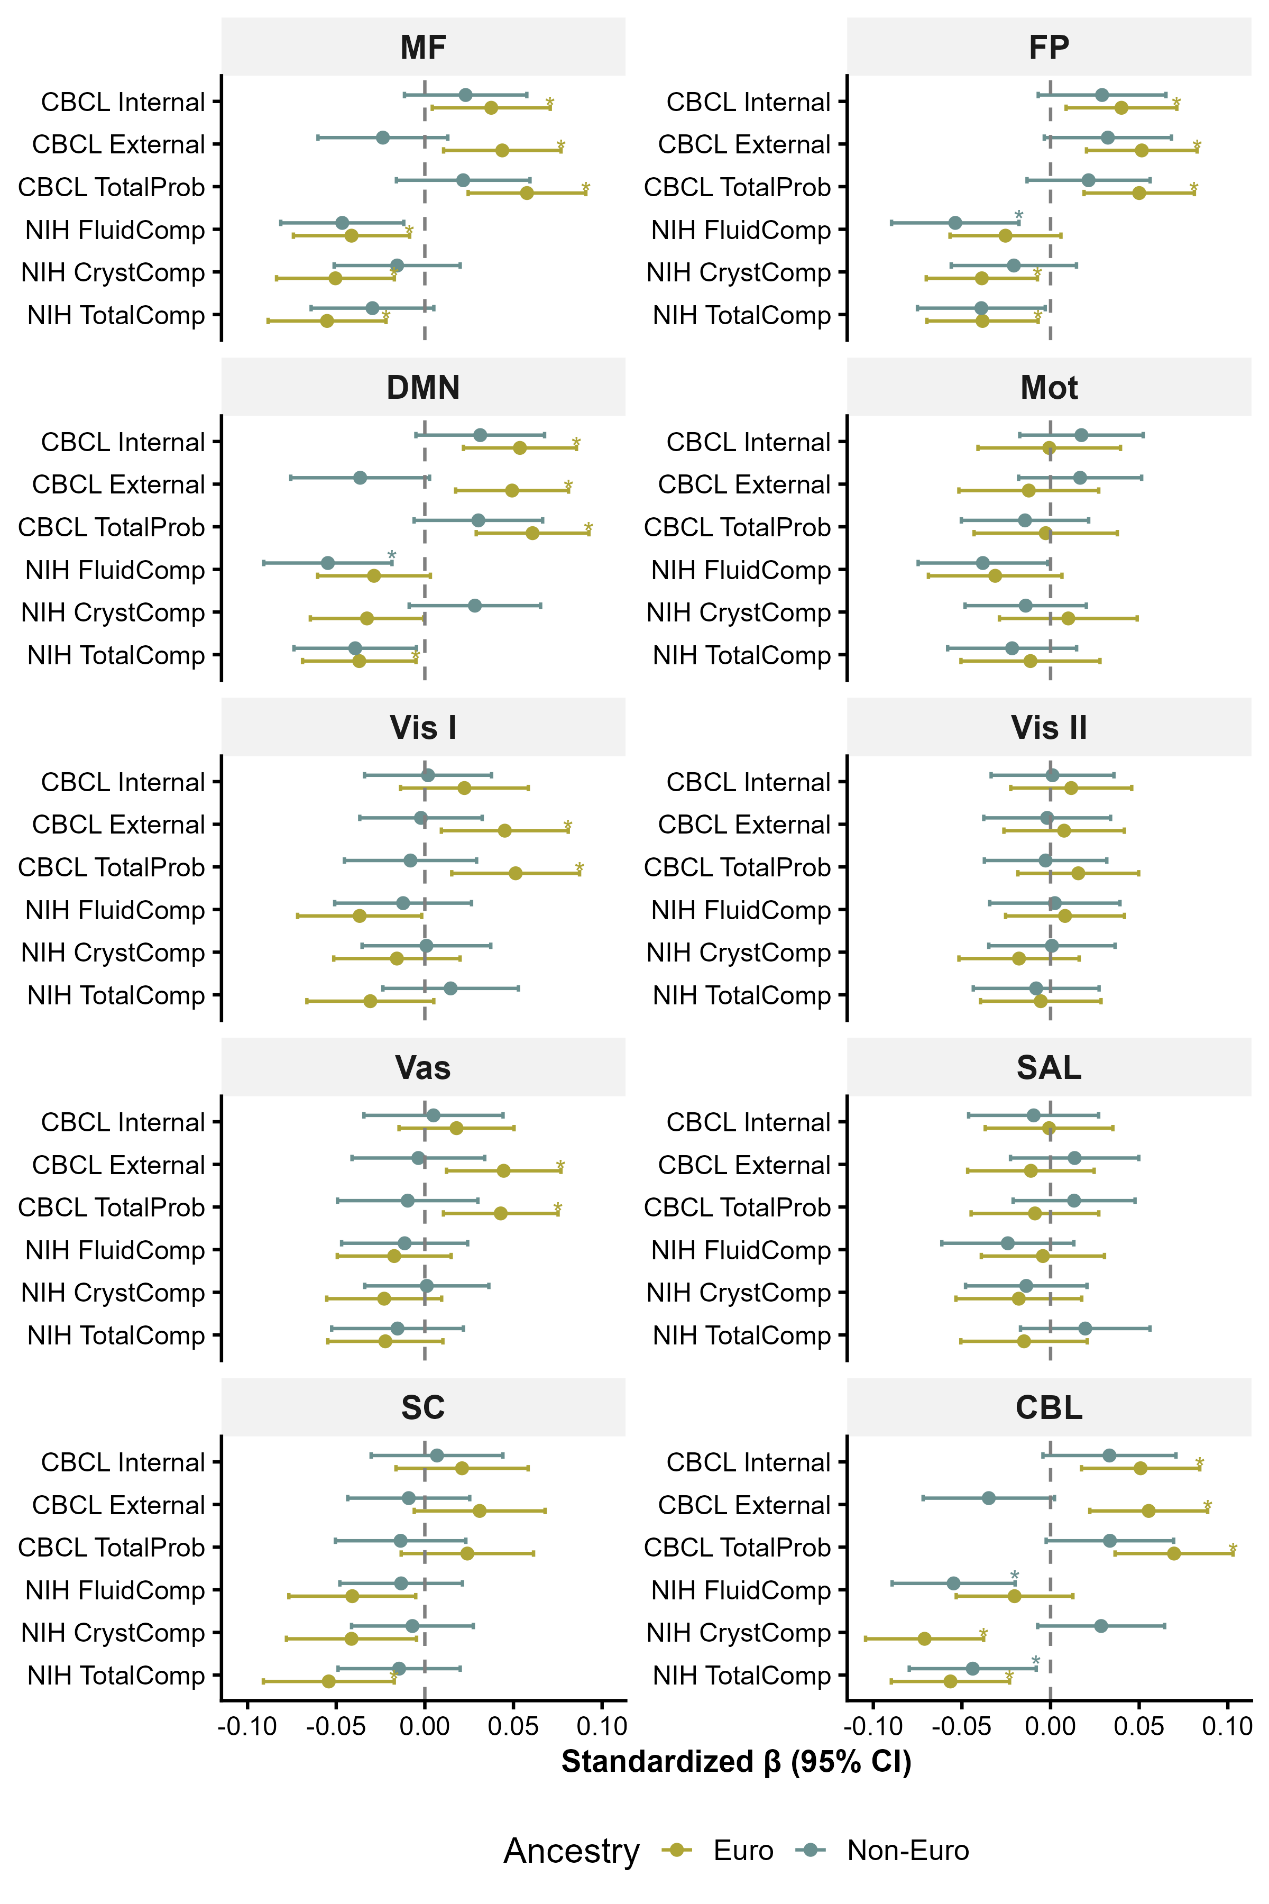


## Supplementary Figure 13. Ancestry-stratified Associations between Brain Network Controllability and Behavioral Outcomes.

Standardized *β* coefficients (dots) and 95% confidence intervals (horizontal lines) are shown for the associations between each brain network controllability and behavioral measure, stratified by race (European ancestry: yellow; non-European ancestry: teal). Asterisks indicate associations that remained statistically significant after FDR correction (*q* < .05). Abbreviations: CBL, cerebellar network, DMN, default mode network, FP, frontoparietal network, MF, medial frontal network, Mot, motor network, SAL, salience network, SC, subcortical network, Vas, visual association network, Vis I, visual network I, Vis II, visual network II.


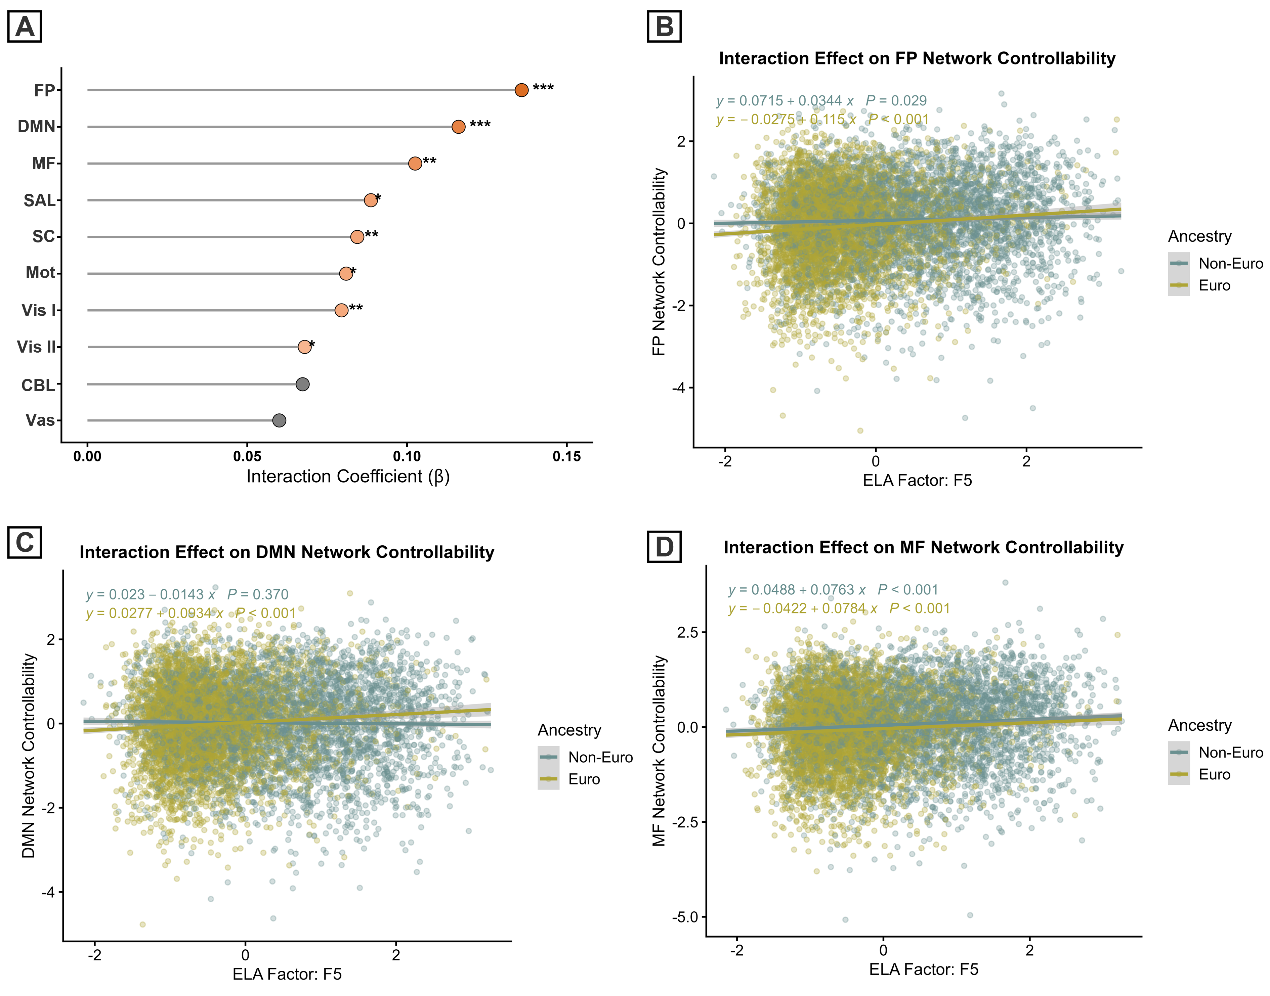


## Supplementary Figure 14. Interaction Effects Between ELA Factors and Ancestry on Brain Network Controllability.

(A) Forest plot shows interaction coefficients (*β*) from linear mixed-effects models testing ELA factors × ancestry interaction terms on brain network controllability. Significant interactions (*q* < .05) were observed in 8 out of 10 networks, indicating ancestry-specific embedding of early life adversity. Asterisks indicate FDR-corrected statistical significance levels: *** *q* < .001, ** *q* < .01, * *q* < .05. (B-D) Scatterplots visualize the interaction effects for FP (B), DMN (C), and MF (D) networks. Slopes are plotted separately for European and non-European groups. Shaded regions indicate 95% confidence intervals. The ancestry-moderated associations are apparent in divergence of slopes across groups. Abbreviations: CBL, cerebellar network, DMN, default mode network, FP, frontoparietal network, MF, medial frontal network, Mot, motor network, SAL, salience network, SC, subcortical network, Vas, visual association network, Vis I, visual network I, Vis II, visual network II.
